# Supplementary material for: SMAD‐specific E3 ubiquitin ligase 2 promotes angiogenesis by facilitating PTX3 degradation in MSCs from patients with ankylosing spondylitis
Source: PubMed Central journal article supplement — Stem Cells. 2021 Feb 6;39(5):581–99. doi: 10.1002/stem.3332 (PMC8248389; doi:10.1002/stem.3332), 2021-02-06
Supplement: STEM-39-581-s004.pdf [file STEM-39-581-s004.pdf]

| Accession |
|-----------|
|-----------|

|            |
|------------|
| P35908     |
| P35527     |
| P08779     |
| Q9HAU4     |
| H6VRF8     |
| P02533     |
| P13645     |
| B4DRR0     |
| A0M8Q6     |
| Q04695     |
| P08670     |
| P04259     |
| P81605     |
| P13647     |
| Q59EB5     |
| P31151     |
| F8W1R7     |
| B4DW52     |
| P62805     |
| P05109     |
| C9JA05     |
| Q86YZ3     |
| P12273     |
| F6KPG5     |
| B4DKV4     |
| AOA0C4DGN4 |
| F5H6Q2     |
| P26022     |
| P29508     |
| Q0KKI6     |
| Q9UL72     |
| Q9UL78     |
| E9PPU1     |
| P01040     |
| Q5K684     |
| Q9BS10     |
| S6BAN6     |
| B4DF70     |
| B4DMJ5     |
| P07355     |
| AOA068LN13 |
| A0M8Q9     |
| AOA193CHR0 |
| B7Z6P1     |
| P07737     |
| AOA0A0MS15 |
| P04792     |
| P04083     |
| Q562Z4     |
| AOA0X9TD47 |
| P25311     |
| P67809     |

|            |
|------------|
| A0A2P9ALU8 |
| A0A1B0GVI3 |
| P25815     |
| E5RIP1     |
| P05089     |
| B4DRW1     |
| B3KPS3     |
| Q9BYF7     |
| P08727     |
| E9PQB7     |
| P35579     |
| A2KBC1     |
| C9JB90     |
| A0A0A0MSI0 |
| H0YI54     |
| F8VPE8     |
| Q9NP55     |
| Q96T46     |
| B4DNJ4     |
| B4DUQ1     |
| J3KMX5     |
| H3BTN5     |
| P47929     |
| F8VV32     |
| MOQX76     |
| A0A075B6S2 |
| A0A024R1X8 |
| A1A4E9     |
| A0A125U0U7 |
| MOQZK8     |
| P04406     |
| A2J1M2     |
| A0A2P9ANF3 |
| V9GZN0     |
| P31947     |
| P31944     |
| P06748     |
| J3KSJ0     |
| Q96RE1     |
| A0A087WWU8 |
| Q6N095     |
| P68366     |
| P00338     |
| A0A087WXQ8 |
| Q6KB66     |
| Q9UL83     |
| E7EQB2     |
| Q96K68     |
| P62263     |
| A8K9J7     |
| P00738     |
| P63104     |
| Q86W20     |
| U3KQF3     |
| G3V5R8     |
| Q9BZU1     |

|            |
|------------|
| Q6MZU6     |
| B4E1B2     |
| F5H2R5     |
| S6B2A1     |
| K7ENT6     |
| D6RA73     |
| P15924     |
| H7C1V0     |
| Q9NSB2     |
| Q5XKE5     |
| Q08188     |
| I3L3P7     |
| Q3KRA7     |
| D6RHX1     |
| D6RGE0     |
| Q14887     |
| Q0IIN1     |
| E4W6B6     |
| Q01469     |
| A0A0M4B4Y9 |
| HOYDD8     |
| Q08ES8     |
| Q03135     |
| P08311     |
| P11021     |
| P62269     |
| Q7L4N0     |
| O60361     |
| P10599     |
| HOYLP6     |
| A8K5N5     |
| J3KTJ3     |
| A0A2P9ARY7 |
| P05164     |
| Q6LDQ3     |
| E9PJD9     |
| B4DGW3     |
| D6RCA8     |
| Q53HF2     |
| H3BU31     |
| HOYH81     |
| Q8N1N4     |
| B8ZZK4     |
| Q9BSW5     |
| F8WD59     |
| B7ZW15     |
| B2R4M6     |
| HOY9P0     |
| H3BQN4     |
| P0DOX2     |
| J3KRG2     |
| HOYFC6     |
| B4DFN9     |
| HOYJ11     |
| Q9HCY8     |
| Q1W658     |

|            |
|------------|
| AOA0X9T0H6 |
| Q02413     |
| P12236     |
| O95969     |
| F8VUA6     |
| Q8N1H4     |
| B7Z9V0     |
| P16403     |
| P01833     |
| J3KTJ1     |
| D3DS95     |
| P59665     |
| R4GN98     |
| J3KTJ8     |
| K7EM02     |
| Q9BY74     |
| MOR1H6     |
| K7ESE8     |
| AOA024R9E2 |
| Q5RLJ0     |
| A8K088     |
| B2MUD5     |
| I3L1P4     |
| C9JAJ4     |
| B2R5H0     |
| Q86TT1     |
| P0DMR2     |
| Q7Z3Y7     |
| D3DP16     |
| Q96IR1     |
| D6RD47     |
| O76013     |
| S6BGE0     |
| Q5D862     |
| B2R7Z6     |
| B7Z4U6     |
| I3L514     |
| K7EIE7     |
| F8WE65     |
| F5H631     |
| E9PP36     |
| F8VWU1     |
| Q8N519     |
| P62851     |
| B7Z7N3     |
| Q9P0J7     |
| Q9UGM3     |
| Q5VSP4     |
| MOQZN2     |
| Q14525     |
| P68431     |
| P01023     |
| Q1RMG2     |
| Q59GX5     |
| A2N0U5     |
| Q9UJU1     |

|            |
|------------|
| B4DP51     |
| V9HWC6     |
| A8MUD9     |
| P20061     |
| E9PN50     |
| A0A024R952 |
| B3KPZ8     |
| A4UCS8     |
| B4DZY9     |
| B3KS36     |
| Q6MZX7     |
| Q5TOR7     |
| G3V2J8     |
| A0A2P9AGW9 |
| P31146     |
| C9JMD7     |
| A0A0J9YXP8 |
| G3V5V7     |
| Q16610     |
| Q53H37     |
| C9JZ20     |
| B7Z7V0     |
| X6RCK5     |
| Q8IWR8     |
| P17900     |
| Q8TC04     |
| B4DHM5     |
| A0A087WVV2 |
| Q3SYB5     |
| G3V3A0     |
| B4YAH7     |
| B7Z5E7     |
| D6RF20     |
| B3KTM1     |
| A0JNT2     |
| Q09666     |
| P04040     |
| P80188     |
| B7Z577     |
| B4DN66     |
| B5MCP9     |
| P35900     |
| B4DHR1     |
| B4E2V5     |
| D6CHE9     |
| I6L957     |
| Q6ZVX7     |
| P49411     |
| A0A096WP35 |
| P28070     |
| Q53RT3     |
| Q9HB00     |
| P06730     |
| B7ZLE5     |
| P13639     |
| A0A0D9SFB3 |

|            |
|------------|
| H7C1U0     |
| Q8WVV4     |
| P02452     |
| Q0EFA5     |
| Q2NLD4     |
| C9J6W7     |
| Q17RP2     |
| Q0PHS1     |
| Q15717     |
| Q5VU21     |
| I0B0K8     |
| D6REL8     |
| B4DPN0     |
| B3KTM6     |
| Q5T750     |
| B3KRY5     |
| O00204     |
| Q5VVQ6     |
| B3KVX6     |
| C9JGI3     |
| B4DP70     |
| A0A2P9AJ95 |
| B4DWR5     |
| B3KSB8     |
| P19474     |
| A0A0C4DH52 |
| D6RCT7     |
| Q8IW75     |
| K7EKL3     |
| A0A2P9ALX2 |
| A0A087X0B7 |
| O00425     |
| Q15149     |
| B3KQ20     |
| P52732     |
| B4E216     |
| B4DGF6     |
| B4DET7     |
| A0A024RC29 |
| Q9H6N6     |
| K7EQ71     |
| Q9HC84     |
| P02461     |
| A0A0U1RQF0 |
| A0A087WWY3 |
| Q8N3K9     |

## Description

Keratin, type II cytoskeletal 2 epidermal OS=Homo sapiens OX=9606 GN=KRT2 PE=1 SV=2 - [K22E\_HUMAN]

Keratin, type I cytoskeletal 9 OS=Homo sapiens OX=9606 GN=KRT9 PE=1 SV=3 - [K1C9\_HUMAN]

Keratin, type I cytoskeletal 16 OS=Homo sapiens OX=9606 GN=KRT16 PE=1 SV=4 - [K1C16\_HUMAN]

E3 ubiquitin-protein ligase SMURF2 OS=Homo sapiens OX=9606 GN=SMURF2 PE=1 SV=1 - [SMUF2\_HUMAN]

Keratin 1 OS=Homo sapiens OX=9606 GN=KRT1 PE=3 SV=1 - [H6VRF8\_HUMAN]

Keratin, type I cytoskeletal 14 OS=Homo sapiens OX=9606 GN=KRT14 PE=1 SV=4 - [K1C14\_HUMAN]

Keratin, type I cytoskeletal 10 OS=Homo sapiens OX=9606 GN=KRT10 PE=1 SV=6 - [K1C10\_HUMAN]

cDNA FLJ53910, highly similar to Keratin, type II cytoskeletal 6A OS=Homo sapiens OX=9606 PE=2 SV=1 - [B4DRRO\_HUMAN]

Immunoglobulin lambda constant 7 OS=Homo sapiens OX=9606 GN=IGLC7 PE=1 SV=3 - [IGLC7\_HUMAN]

Keratin, type I cytoskeletal 17 OS=Homo sapiens OX=9606 GN=KRT17 PE=1 SV=2 - [K1C17\_HUMAN]

Vimentin OS=Homo sapiens OX=9606 GN=VIM PE=1 SV=4 - [VIME\_HUMAN]

Keratin, type II cytoskeletal 6B OS=Homo sapiens OX=9606 GN=KRT6B PE=1 SV=5 - [K2C6B\_HUMAN]

Dermcidin OS=Homo sapiens OX=9606 GN=DCD PE=1 SV=2 - [DCD\_HUMAN]

Keratin, type II cytoskeletal 5 OS=Homo sapiens OX=9606 GN=KRT5 PE=1 SV=3 - [K2C5\_HUMAN]

CSDA protein variant (Fragment) OS=Homo sapiens OX=9606 PE=2 SV=1 - [Q59EB5\_HUMAN]

Protein S100-A7 OS=Homo sapiens OX=9606 GN=S100A7 PE=1 SV=4 - [S10A7\_HUMAN]

Myosin light polypeptide 6 OS=Homo sapiens OX=9606 GN=MYL6 PE=1 SV=1 - [F8W1R7\_HUMAN]

cDNA FLJ55253, highly similar to Actin, cytoplasmic 1 OS=Homo sapiens OX=9606 PE=2 SV=1 - [B4DW52\_HUMAN]

Histone H4 OS=Homo sapiens OX=9606 GN=HIST1H4A PE=1 SV=2 - [H4\_HUMAN]

Protein S100-A8 OS=Homo sapiens OX=9606 GN=S100A8 PE=1 SV=1 - [S10A8\_HUMAN]

Immunoglobulin J chain (Fragment) OS=Homo sapiens OX=9606 GN=JCHAIN PE=1 SV=1 - [C9JA05\_HUMAN]

Hornerin OS=Homo sapiens OX=9606 GN=HRNR PE=1 SV=2 - [HORN\_HUMAN]

Prolactin-inducible protein OS=Homo sapiens OX=9606 GN=PIP PE=1 SV=1 - [PIP\_HUMAN]

Albumin (Fragment) OS=Homo sapiens OX=9606 PE=2 SV=1 - [F6KPG5\_HUMAN]

cDNA FLJ60647, highly similar to Keratin, type II cytoskeletal 6B OS=Homo sapiens OX=9606 PE=2 SV=1 - [B4DKV4\_HUMAN]

Zymogen granule protein 16 homolog B OS=Homo sapiens OX=9606 GN=ZG16B PE=1 SV=1 - [A0A0C4DGN4\_HUMAN]

Polyubiquitin-C (Fragment) OS=Homo sapiens OX=9606 GN=UBC PE=1 SV=8 - [F5H6Q2\_HUMAN]

Pentraxin-related protein PTX3 OS=Homo sapiens OX=9606 GN=PTX3 PE=1 SV=3 - [PTX3\_HUMAN]

Serpin B3 OS=Homo sapiens OX=9606 GN=SERPINB3 PE=1 SV=2 - [SPB3\_HUMAN]

Immunoglobulin light chain (Fragment) OS=Homo sapiens OX=9606 PE=1 SV=1 - [Q0KKI6\_HUMAN]

Myosin-reactive immunoglobulin heavy chain variable region (Fragment) OS=Homo sapiens OX=9606 PE=2 SV=1 - [Q9UL72\_HUMAN]

Myosin-reactive immunoglobulin light chain variable region (Fragment) OS=Homo sapiens OX=9606 PE=2 SV=1 - [Q9UL78\_HUMAN]

40S ribosomal protein S3 OS=Homo sapiens OX=9606 GN=RPS3 PE=1 SV=1 - [E9PPU1\_HUMAN]

Cystatin-A OS=Homo sapiens OX=9606 GN=CSTA PE=1 SV=1 - [CYTA\_HUMAN]

SCCA1/SCCA2 fusion protein OS=Homo sapiens OX=9606 PE=2 SV=1 - [Q5K684\_HUMAN]

Similar to ribosomal protein S8 (Fragment) OS=Homo sapiens OX=9606 PE=2 SV=1 - [Q9BS10\_HUMAN]

IgG L chain OS=Homo sapiens OX=9606 PE=2 SV=1 - [S6BAN6\_HUMAN]

cDNA FLJ60461, highly similar to Peroxiredoxin-2 (EC 1.11.1.15) OS=Homo sapiens OX=9606 PE=2 SV=1 - [B4DF70\_HUMAN]

cDNA FLJ53012, highly similar to Tubulin beta-7 chain OS=Homo sapiens OX=9606 PE=2 SV=1 - [B4DMJ5\_HUMAN]

Annexin A2 OS=Homo sapiens OX=9606 GN=ANXA2 PE=1 SV=2 - [ANXA2\_HUMAN]

Ig heavy chain variable region (Fragment) OS=Homo sapiens OX=9606 PE=2 SV=1 - [A0A068LN13\_HUMAN]

C1 segment protein (Fragment) OS=Homo sapiens OX=9606 GN=C1 segment PE=4 SV=1 - [A0M8Q9\_HUMAN]

10E8 heavy chain variable region (Fragment) OS=Homo sapiens OX=9606 PE=2 SV=1 - [A0A193CHR0\_HUMAN]

cDNA FLJ53662, highly similar to Actin, alpha skeletal muscle OS=Homo sapiens OX=9606 PE=2 SV=1 - [B7Z6P1\_HUMAN]

Profilin-1 OS=Homo sapiens OX=9606 GN=PFN1 PE=1 SV=2 - [PROF1\_HUMAN]

Immunoglobulin heavy variable 3-49 OS=Homo sapiens OX=9606 GN=IGHV3-49 PE=3 SV=1 - [HV349\_HUMAN]

Heat shock protein beta-1 OS=Homo sapiens OX=9606 GN=HSPB1 PE=1 SV=2 - [HSPB1\_HUMAN]

Annexin A1 OS=Homo sapiens OX=9606 GN=ANXA1 PE=1 SV=2 - [ANXA1\_HUMAN]

Actin-like protein (Fragment) OS=Homo sapiens OX=9606 GN=ACT PE=4 SV=1 - [Q562Z4\_HUMAN]

MS-D1 light chain variable region (Fragment) OS=Homo sapiens OX=9606 PE=2 SV=1 - [A0A0X9TD47\_HUMAN]

Zinc-alpha-2-glycoprotein OS=Homo sapiens OX=9606 GN=AZGP1 PE=1 SV=2 - [ZA2G\_HUMAN]

Nuclease-sensitive element-binding protein 1 OS=Homo sapiens OX=9606 GN=YBX1 PE=1 SV=3 - [YBOX1\_HUMAN]

|                                                                                                                                         |
|-----------------------------------------------------------------------------------------------------------------------------------------|
| Chaperone Hsp10, affects cell division OS=Homo sapiens OX=9606 GN=groES PE=4 SV=1 - [A0A2P9ALU8_HUMAN]                                  |
| Keratin, type I cytoskeletal 10 (Fragment) OS=Homo sapiens OX=9606 GN=KRT10 PE=1 SV=1 - [A0A1B0GVI3_HUMAN]                              |
| Protein S100-P OS=Homo sapiens OX=9606 GN=S100P PE=1 SV=2 - [S100P_HUMAN]                                                               |
| 40S ribosomal protein S20 OS=Homo sapiens OX=9606 GN=RPS20 PE=1 SV=1 - [E5RIP1_HUMAN]                                                   |
| Arginase-1 OS=Homo sapiens OX=9606 GN=ARG1 PE=1 SV=2 - [ARGI1_HUMAN]                                                                    |
| cDNA FLJ55805, highly similar to Keratin, type II cytoskeletal 4 OS=Homo sapiens OX=9606 PE=2 SV=1 - [B4DRW1_HUMAN]                     |
| Tubulin alpha chain OS=Homo sapiens OX=9606 PE=2 SV=1 - [B3KPS3_HUMAN]                                                                  |
| SCCA2b OS=Homo sapiens OX=9606 GN=SCCA2 PE=2 SV=1 - [Q9BYF7_HUMAN]                                                                      |
| Keratin, type I cytoskeletal 19 OS=Homo sapiens OX=9606 GN=KRT19 PE=1 SV=4 - [K1C19_HUMAN]                                              |
| Cofilin-1 (Fragment) OS=Homo sapiens OX=9606 GN=CFL1 PE=1 SV=1 - [E9PQB7_HUMAN]                                                         |
| Myosin-9 OS=Homo sapiens OX=9606 GN=MYH9 PE=1 SV=4 - [MYH9_HUMAN]                                                                       |
| Anti-(ED-B) scFV (Fragment) OS=Homo sapiens OX=9606 PE=2 SV=2 - [A2KBC1_HUMAN]                                                          |
| Ras-related protein Rab-6B (Fragment) OS=Homo sapiens OX=9606 GN=RAB6B PE=4 SV=1 - [C9JB90_HUMAN]                                       |
| Peroxiredoxin-1 (Fragment) OS=Homo sapiens OX=9606 GN=PRDX1 PE=1 SV=1 - [A0A0A0MSI0_HUMAN]                                              |
| Keratin, type II cytoskeletal 78 (Fragment) OS=Homo sapiens OX=9606 GN=KRT78 PE=3 SV=2 - [H0YI54_HUMAN]                                 |
| 60S acidic ribosomal protein P0 (Fragment) OS=Homo sapiens OX=9606 GN=RPLP0 PE=1 SV=1 - [F8VPE8_HUMAN]                                  |
| BPI fold-containing family A member 1 OS=Homo sapiens OX=9606 GN=BPIFA1 PE=1 SV=1 - [BPIA1_HUMAN]                                       |
| Hemoglobin alpha 2 (Fragment) OS=Homo sapiens OX=9606 GN=HBA2 PE=3 SV=1 - [Q96T46_HUMAN]                                                |
| cDNA FLJ53742, highly similar to Urokinase-type plasminogen activator (EC 3.4.21.73) OS=Homo sapiens OX=9606 PE=2 SV=1 - [B4DNJ4_HUMAN] |
| cDNA FLJ54552, highly similar to Heterogeneous nuclear ribonucleoprotein K OS=Homo sapiens OX=9606 PE=2 SV=1 - [B4DUQ1_HUMAN]           |
| 40S ribosomal protein S13 OS=Homo sapiens OX=9606 GN=RPS13 PE=1 SV=1 - [J3KMX5_HUMAN]                                                   |
| Pyruvate kinase (Fragment) OS=Homo sapiens OX=9606 GN=PKM PE=1 SV=1 - [H3BTN5_HUMAN]                                                    |
| Galactin-7 OS=Homo sapiens OX=9606 GN=LGALS7 PE=1 SV=2 - [LEG7_HUMAN]                                                                   |
| Lysozyme OS=Homo sapiens OX=9606 GN=LYZ PE=1 SV=1 - [F8VV32_HUMAN]                                                                      |
| 40S ribosomal protein S16 (Fragment) OS=Homo sapiens OX=9606 GN=RPS16 PE=1 SV=1 - [M0QX76_HUMAN]                                        |
| Immunoglobulin kappa variable 2D-29 OS=Homo sapiens OX=9606 GN=IGKV2D-29 PE=3 SV=1 - [KVD29_HUMAN]                                      |
| Junction plakoglobin, isoform CRA_a OS=Homo sapiens OX=9606 GN=JUP PE=4 SV=1 - [A0A024R1X8_HUMAN]                                       |
| Keratin 13 OS=Homo sapiens OX=9606 GN=KRT13 PE=1 SV=1 - [A1A4E9_HUMAN]                                                                  |
| MS-C1 heavy chain variable region (Fragment) OS=Homo sapiens OX=9606 PE=2 SV=1 - [A0A125U0U7_HUMAN]                                     |
| Uncharacterized protein OS=Homo sapiens OX=9606 PE=4 SV=1 - [M0QZK8_HUMAN]                                                              |
| Glyceraldehyde-3-phosphate dehydrogenase OS=Homo sapiens OX=9606 GN=GAPDH PE=1 SV=3 - [G3P_HUMAN]                                       |
| Rheumatoid factor RF-IP9 (Fragment) OS=Homo sapiens OX=9606 PE=2 SV=1 - [A2J1M2_HUMAN]                                                  |
| Chaperone Hsp10, affects cell division OS=Homo sapiens OX=9606 GN=groES PE=4 SV=1 - [A0A2P9ANF3_HUMAN]                                  |
| Uncharacterized protein (Fragment) OS=Homo sapiens OX=9606 PE=3 SV=1 - [V9GZNO_HUMAN]                                                   |
| 14-3-3 protein sigma OS=Homo sapiens OX=9606 GN=SFN PE=1 SV=1 - [1433S_HUMAN]                                                           |
| Caspase-14 OS=Homo sapiens OX=9606 GN=CASP14 PE=1 SV=2 - [CASPE_HUMAN]                                                                  |
| Nucleophosmin OS=Homo sapiens OX=9606 GN=NPM1 PE=1 SV=2 - [NPM_HUMAN]                                                                   |
| 60S ribosomal protein L17 (Fragment) OS=Homo sapiens OX=9606 GN=RPL17 PE=3 SV=1 - [J3KSJ0_HUMAN]                                        |
| Translation elongation factor 1 alpha 1-like 14 OS=Homo sapiens OX=9606 GN=EEF1A1L14 PE=2 SV=1 - [Q96RE1_HUMAN]                         |
| Tropomyosin alpha-3 chain OS=Homo sapiens OX=9606 GN=TPM3 PE=1 SV=1 - [A0A087WWU8_HUMAN]                                                |
| Uncharacterized protein OS=Homo sapiens OX=9606 GN=DKFZp686K03196 PE=1 SV=1 - [Q6N095_HUMAN]                                            |
| Tubulin alpha-4A chain OS=Homo sapiens OX=9606 GN=TUBA4A PE=1 SV=1 - [TBA4A_HUMAN]                                                      |
| L-lactate dehydrogenase A chain OS=Homo sapiens OX=9606 GN=LDHA PE=1 SV=2 - [LDHA_HUMAN]                                                |
| Proteasome subunit beta type-3 OS=Homo sapiens OX=9606 GN=PSMB3 PE=1 SV=1 - [A0A087WXQ8_HUMAN]                                          |
| Keratin, type II cytoskeletal 80 OS=Homo sapiens OX=9606 GN=KRT80 PE=1 SV=2 - [K2C80_HUMAN]                                             |
| Myosin-reactive immunoglobulin light chain variable region (Fragment) OS=Homo sapiens OX=9606 PE=2 SV=1 - [Q9UL83_HUMAN]                |
| Lactotransferrin (Fragment) OS=Homo sapiens OX=9606 GN=LTF PE=1 SV=1 - [E7EQB2_HUMAN]                                                   |
| cDNA FLJ14473 fis, clone MAMMA1001080, highly similar to Homo sapiens SNC73 protein (SNC73) mRNA OS=Homo sapiens OX=9606 PE=2 SV=1      |
| 40S ribosomal protein S14 OS=Homo sapiens OX=9606 GN=RPS14 PE=1 SV=3 - [RS14_HUMAN]                                                     |
| Histone H2B OS=Homo sapiens OX=9606 PE=2 SV=1 - [A8K9J7_HUMAN]                                                                          |
| Haptoglobin OS=Homo sapiens OX=9606 GN=HP PE=1 SV=1 - [HPT_HUMAN]                                                                       |
| 14-3-3 protein zeta/delta OS=Homo sapiens OX=9606 GN=YWHAZ PE=1 SV=1 - [1433Z_HUMAN]                                                    |
| Protease serine 1 (Fragment) OS=Homo sapiens OX=9606 GN=PRSS1 PE=4 SV=1 - [Q86W20_HUMAN]                                                |
| Triosephosphate isomerase (Fragment) OS=Homo sapiens OX=9606 GN=TPI1 PE=1 SV=1 - [U3KQF3_HUMAN]                                         |
| Alpha-1-antitrypsin (Fragment) OS=Homo sapiens OX=9606 GN=SERPINA1 PE=1 SV=1 - [G3V5R8_HUMAN]                                           |
| PNAS-20 OS=Homo sapiens OX=9606 PE=2 SV=1 - [Q9BZU1_HUMAN]                                                                              |



|                                                                                                                                         |
|-----------------------------------------------------------------------------------------------------------------------------------------|
| Uncharacterized protein DKFZp686C15213 OS=Homo sapiens OX=9606 GN=DKFZp686C15213 PE=2 SV=1 - [Q6MZU6_HUMAN]                             |
| cDNA FLJ53691, highly similar to Serotransferrin OS=Homo sapiens OX=9606 PE=2 SV=1 - [B4E1B2_HUMAN]                                     |
| Rho GDP-dissociation inhibitor 2 (Fragment) OS=Homo sapiens OX=9606 GN=ARHGDI2 PE=1 SV=1 - [F5H2R5_HUMAN]                               |
| IgG L chain OS=Homo sapiens OX=9606 PE=2 SV=1 - [S6B2A1_HUMAN]                                                                          |
| Tropomyosin alpha-4 chain (Fragment) OS=Homo sapiens OX=9606 GN=TPM4 PE=1 SV=1 - [K7ENT6_HUMAN]                                         |
| Stress-70 protein, mitochondrial (Fragment) OS=Homo sapiens OX=9606 GN=HSPA9 PE=1 SV=1 - [D6RA73_HUMAN]                                 |
| Desmoplakin OS=Homo sapiens OX=9606 GN=DSP PE=1 SV=3 - [DESP_HUMAN]                                                                     |
| Cathepsin D (Fragment) OS=Homo sapiens OX=9606 GN=CTSD PE=1 SV=1 - [H7C1V0_HUMAN]                                                       |
| Keratin, type II cuticular Hb4 OS=Homo sapiens OX=9606 GN=KRT84 PE=2 SV=2 - [KRT84_HUMAN]                                               |
| Keratin, type II cytoskeletal 79 OS=Homo sapiens OX=9606 GN=KRT79 PE=1 SV=2 - [K2C79_HUMAN]                                             |
| Protein-glutamine gamma-glutamyltransferase E OS=Homo sapiens OX=9606 GN=TGM3 PE=1 SV=4 - [TGM3_HUMAN]                                  |
| 40S ribosomal protein S15a OS=Homo sapiens OX=9606 GN=RPS15A PE=1 SV=1 - [I3L3P7_HUMAN]                                                 |
| FGA protein (Fragment) OS=Homo sapiens OX=9606 GN=FGA PE=2 SV=1 - [Q3KRA7_HUMAN]                                                        |
| Mucin-7 (Fragment) OS=Homo sapiens OX=9606 GN=MUC7 PE=1 SV=1 - [D6RHX1_HUMAN]                                                           |
| 40S ribosomal protein S3a (Fragment) OS=Homo sapiens OX=9606 GN=RPS3A PE=1 SV=1 - [D6RGE0_HUMAN]                                        |
| Mucin (Fragment) OS=Homo sapiens OX=9606 GN=MUC5AC PE=2 SV=1 - [Q14887_HUMAN]                                                           |
| Keratin 77 OS=Homo sapiens OX=9606 GN=KRT77 PE=1 SV=1 - [Q0IIN1_HUMAN]                                                                  |
| RPL27/NME2 fusion protein (Fragment) OS=Homo sapiens OX=9606 GN=RPL27 PE=2 SV=1 - [E4W6B6_HUMAN]                                        |
| Fatty acid-binding protein, epidermal OS=Homo sapiens OX=9606 GN=FABP5 PE=1 SV=3 - [FABP5_HUMAN]                                        |
| Cellular tumor antigen p53 (Fragment) OS=Homo sapiens OX=9606 GN=TP53 PE=3 SV=1 - [A0A0M4B4Y9_HUMAN]                                    |
| 60S acidic ribosomal protein P2 (Fragment) OS=Homo sapiens OX=9606 GN=RPLP2 PE=1 SV=1 - [HOYDD8_HUMAN]                                  |
| Cell growth-inhibiting protein 34 OS=Homo sapiens OX=9606 PE=2 SV=1 - [Q08ES8_HUMAN]                                                    |
| Caveolin-1 OS=Homo sapiens OX=9606 GN=CAV1 PE=1 SV=4 - [CAV1_HUMAN]                                                                     |
| Cathepsin G OS=Homo sapiens OX=9606 GN=CTSG PE=1 SV=2 - [CATG_HUMAN]                                                                    |
| Endoplasmic reticulum chaperone BiP OS=Homo sapiens OX=9606 GN=HSPA5 PE=1 SV=2 - [BIP_HUMAN]                                            |
| 40S ribosomal protein S18 OS=Homo sapiens OX=9606 GN=RPS18 PE=1 SV=3 - [RS18_HUMAN]                                                     |
| CAPZB protein (Fragment) OS=Homo sapiens OX=9606 GN=CAPZB PE=2 SV=1 - [Q7L4N0_HUMAN]                                                    |
| Putative nucleoside diphosphate kinase OS=Homo sapiens OX=9606 GN=NME2P1 PE=5 SV=1 - [NDK8_HUMAN]                                       |
| Thioredoxin OS=Homo sapiens OX=9606 GN=TXN PE=1 SV=3 - [THIO_HUMAN]                                                                     |
| 60S ribosomal protein L28 OS=Homo sapiens OX=9606 GN=RPL28 PE=1 SV=1 - [HOYLP6_HUMAN]                                                   |
| cDNA FLJ78142, highly similar to Homo sapiens transglutaminase 1 (K polypeptide epidermal type I, protein-glutamine-gamma-glutamyltrans |
| 60S ribosomal protein L23 OS=Homo sapiens OX=9606 GN=RPL23 PE=1 SV=1 - [J3KTJ3_HUMAN]                                                   |
| Ketosteroid isomerase OS=Homo sapiens OX=9606 GN=BQ8482_380124 PE=4 SV=1 - [A0A2P9ARY7_HUMAN]                                           |
| Myeloperoxidase OS=Homo sapiens OX=9606 GN=MPO PE=1 SV=1 - [PERM_HUMAN]                                                                 |
| Sulfated glycoprotein 2 (Fragment) OS=Homo sapiens OX=9606 PE=2 SV=1 - [Q6LDQ3_HUMAN]                                                   |
| 60S ribosomal protein L27a OS=Homo sapiens OX=9606 GN=RPL27A PE=1 SV=1 - [E9PJD9_HUMAN]                                                 |
| cDNA FLJ54625, highly similar to ATP synthase subunit alpha, mitochondrial (EC 3.6.3.14) OS=Homo sapiens OX=9606 PE=2 SV=1 - [B4DGW     |
| Annexin (Fragment) OS=Homo sapiens OX=9606 GN=ANXA3 PE=1 SV=1 - [D6RCA8_HUMAN]                                                          |
| Heat shock 70kDa protein 8 isoform 2 variant (Fragment) OS=Homo sapiens OX=9606 PE=1 SV=1 - [Q53HF2_HUMAN]                              |
| 60S ribosomal protein L4 (Fragment) OS=Homo sapiens OX=9606 GN=RPL4 PE=1 SV=1 - [H3BU31_HUMAN]                                          |
| ATP synthase subunit beta (Fragment) OS=Homo sapiens OX=9606 GN=ATP5F1B PE=1 SV=1 - [HOYH81_HUMAN]                                      |
| Keratin, type II cytoskeletal 78 OS=Homo sapiens OX=9606 GN=KRT78 PE=1 SV=2 - [K2C78_HUMAN]                                             |
| 60S ribosomal protein L31 OS=Homo sapiens OX=9606 GN=RPL31 PE=1 SV=1 - [B8ZZK4_HUMAN]                                                   |
| RPS2 protein (Fragment) OS=Homo sapiens OX=9606 GN=RPS2 PE=2 SV=2 - [Q9BSW5_HUMAN]                                                      |
| 40S ribosomal protein SA (Fragment) OS=Homo sapiens OX=9606 GN=RPSA PE=1 SV=2 - [F8WD59_HUMAN]                                          |
| Uncharacterized protein OS=Homo sapiens OX=9606 PE=2 SV=1 - [B7ZW15_HUMAN]                                                              |
| Protein S100 OS=Homo sapiens OX=9606 PE=2 SV=1 - [B2R4M6_HUMAN]                                                                         |
| Receptor of-activated protein C kinase 1 (Fragment) OS=Homo sapiens OX=9606 GN=RACK1 PE=1 SV=1 - [HOY9P0_HUMAN]                         |
| Fructose-bisphosphate aldolase OS=Homo sapiens OX=9606 GN=ALDOA PE=1 SV=1 - [H3BQN4_HUMAN]                                              |
| Immunoglobulin alpha-2 heavy chain OS=Homo sapiens OX=9606 PE=1 SV=1 - [IGA2_HUMAN]                                                     |
| Gasdermin-A (Fragment) OS=Homo sapiens OX=9606 GN=GSDMA PE=1 SV=8 - [J3KRG2_HUMAN]                                                      |
| GTP-binding nuclear protein Ran (Fragment) OS=Homo sapiens OX=9606 GN=RAN PE=1 SV=1 - [HOYFC6_HUMAN]                                    |
| cDNA FLJ54303, highly similar to Heat shock 70 kDa protein 1 OS=Homo sapiens OX=9606 PE=2 SV=1 - [B4DFN9_HUMAN]                         |
| Alpha-actinin-1 (Fragment) OS=Homo sapiens OX=9606 GN=ACTN1 PE=1 SV=1 - [HOYJ11_HUMAN]                                                  |
| Protein S100-A14 OS=Homo sapiens OX=9606 GN=S100A14 PE=1 SV=1 - [S10AE_HUMAN]                                                           |
| Follicle-stimulating hormone beta subunit (Fragment) OS=Homo sapiens OX=9606 GN=FSHB PE=3 SV=1 - [Q1W658_HUMAN]                         |

|                                                                                                                                                                        |
|------------------------------------------------------------------------------------------------------------------------------------------------------------------------|
| GCT-A5 heavy chain variable region (Fragment) OS=Homo sapiens OX=9606 PE=2 SV=1 - [A0A0X9T0H6_HUMAN]                                                                   |
| Desmoglein-1 OS=Homo sapiens OX=9606 GN=DSG1 PE=1 SV=2 - [DSG1_HUMAN]                                                                                                  |
| ADP/ATP translocase 3 OS=Homo sapiens OX=9606 GN=SLC25A6 PE=1 SV=4 - [ADT3_HUMAN]                                                                                      |
| Secretoglobin family 1D member 2 OS=Homo sapiens OX=9606 GN=SCGB1D2 PE=2 SV=1 - [SG1D2_HUMAN]                                                                          |
| 60S ribosomal protein L18 (Fragment) OS=Homo sapiens OX=9606 GN=RPL18 PE=1 SV=1 - [F8VUA6_HUMAN]                                                                       |
| cDNA FLJ40872 fis, clone TUTER2000283, highly similar to Homo sapiens transformer-2-beta (SFRS10) gene OS=Homo sapiens OX=9606 PE=2 SV=1 - [B7Z9V0_HUMAN]              |
| Histone H1.2 OS=Homo sapiens OX=9606 GN=HIST1H1C PE=1 SV=2 - [H12_HUMAN]                                                                                               |
| Polymeric immunoglobulin receptor OS=Homo sapiens OX=9606 GN=PIGR PE=1 SV=4 - [PIGR_HUMAN]                                                                             |
| Myosin regulatory light chain 12A (Fragment) OS=Homo sapiens OX=9606 GN=MYL12A PE=1 SV=1 - [J3KJTJ1_HUMAN]                                                             |
| HCG21173, isoform CRA_a OS=Homo sapiens OX=9606 GN=hCG_21173 PE=4 SV=1 - [D3DS95_HUMAN]                                                                                |
| Neutrophil defensin 1 OS=Homo sapiens OX=9606 GN=DEFA1 PE=1 SV=1 - [DEF1_HUMAN]                                                                                        |
| Protein S100 (Fragment) OS=Homo sapiens OX=9606 GN=S100A6 PE=1 SV=1 - [R4GN98_HUMAN]                                                                                   |
| 60S ribosomal protein L26 (Fragment) OS=Homo sapiens OX=9606 GN=RPL26 PE=4 SV=8 - [J3KJTJ8_HUMAN]                                                                      |
| Katanin p60 ATPase-containing subunit A-like 2 (Fragment) OS=Homo sapiens OX=9606 GN=KATNAL2 PE=1 SV=1 - [K7EM02_HUMAN]                                                |
| Ribosomal protein L7a (Fragment) OS=Homo sapiens OX=9606 GN=RP-L7a PE=2 SV=1 - [Q9BY74_HUMAN]                                                                          |
| 40S ribosomal protein S11 OS=Homo sapiens OX=9606 GN=RPS11 PE=1 SV=1 - [MOR1H6_HUMAN]                                                                                  |
| Bleomycin hydrolase (Fragment) OS=Homo sapiens OX=9606 GN=BLMH PE=1 SV=1 - [K7ESE8_HUMAN]                                                                              |
| Poly(A) binding protein, cytoplasmic 1, isoform CRA_c OS=Homo sapiens OX=9606 GN=PABPC1 PE=4 SV=1 - [A0A024R9E2_HUMAN]                                                 |
| CLE OS=Homo sapiens OX=9606 PE=2 SV=1 - [Q5RLJ0_HUMAN]                                                                                                                 |
| cDNA FLJ78614, highly similar to Homo sapiens eukaryotic translation initiation factor 4A, isoform 1 (EIF4A1), mRNA OS=Homo sapiens OX=9606 PE=2 SV=1 - [B2MUD5_HUMAN] |
| Proline-, glutamic acid- and leucine-rich protein 1 (Fragment) OS=Homo sapiens OX=9606 GN=PELP1 PE=1 SV=1 - [I3L1P4_HUMAN]                                             |
| Fragile X mental retardation syndrome-related protein 1 (Fragment) OS=Homo sapiens OX=9606 GN=FXR1 PE=1 SV=1 - [C9JAJ4_HUMAN]                                          |
| Protein S100 OS=Homo sapiens OX=9606 PE=2 SV=1 - [B2R5H0_HUMAN]                                                                                                        |
| Full-length cDNA clone CS0DD006YL02 of Neuroblastoma of Homo sapiens (human) OS=Homo sapiens OX=9606 PE=2 SV=1 - [Q86TT1_HUMAN]                                        |
| Secretoglobin family 1C member 2 OS=Homo sapiens OX=9606 GN=SCGB1C2 PE=3 SV=1 - [SG1C2_HUMAN]                                                                          |
| Keratin, type I cytoskeletal 28 OS=Homo sapiens OX=9606 GN=KRT28 PE=1 SV=2 - [K1C28_HUMAN]                                                                             |
| Fibrinogen gamma chain, isoform CRA_a OS=Homo sapiens OX=9606 GN=FGG PE=4 SV=1 - [D3DP16_HUMAN]                                                                        |
| RPS4X protein (Fragment) OS=Homo sapiens OX=9606 GN=RPS4X PE=2 SV=2 - [Q96IR1_HUMAN]                                                                                   |
| 40S ribosomal protein S23 OS=Homo sapiens OX=9606 GN=RPS23 PE=1 SV=1 - [D6RD47_HUMAN]                                                                                  |
| Keratin, type I cuticular Ha6 OS=Homo sapiens OX=9606 GN=KRT36 PE=1 SV=1 - [KRT36_HUMAN]                                                                               |
| IgG H chain OS=Homo sapiens OX=9606 PE=2 SV=1 - [S6BGE0_HUMAN]                                                                                                         |
| Filaggrin-2 OS=Homo sapiens OX=9606 GN=FLG2 PE=1 SV=1 - [FILA2_HUMAN]                                                                                                  |
| cDNA, FLJ93674 OS=Homo sapiens OX=9606 PE=2 SV=1 - [B2R7Z6_HUMAN]                                                                                                      |
| cDNA FLJ55803, highly similar to Gelsolin OS=Homo sapiens OX=9606 PE=2 SV=1 - [B7Z4U6_HUMAN]                                                                           |
| Protein disulfide-isomerase OS=Homo sapiens OX=9606 GN=P4HB PE=1 SV=1 - [I3L514_HUMAN]                                                                                 |
| ATP-citrate synthase (Fragment) OS=Homo sapiens OX=9606 GN=ACLY PE=1 SV=1 - [K7EIE7_HUMAN]                                                                             |
| Peptidyl-prolyl cis-trans isomerase OS=Homo sapiens OX=9606 GN=PPIA PE=1 SV=1 - [F8WE65_HUMAN]                                                                         |
| C-type lectin domain family 2 member B OS=Homo sapiens OX=9606 GN=CLEC2B PE=1 SV=1 - [F5H631_HUMAN]                                                                    |
| 60S ribosomal protein L8 OS=Homo sapiens OX=9606 GN=RPL8 PE=1 SV=1 - [E9PP36_HUMAN]                                                                                    |
| Alpha-lactalbumin OS=Homo sapiens OX=9606 GN=LALBA PE=1 SV=1 - [F8VWU1_HUMAN]                                                                                          |
| LMNA protein OS=Homo sapiens OX=9606 PE=2 SV=1 - [Q8N519_HUMAN]                                                                                                        |
| 40S ribosomal protein S25 OS=Homo sapiens OX=9606 GN=RPS25 PE=1 SV=1 - [RS25_HUMAN]                                                                                    |
| cDNA FLJ51392, highly similar to Keratin, type II cuticular Hb5 OS=Homo sapiens OX=9606 PE=2 SV=1 - [B7Z7N3_HUMAN]                                                     |
| E3 ubiquitin-protein ligase KCMF1 OS=Homo sapiens OX=9606 GN=KCMF1 PE=1 SV=2 - [KCMF1_HUMAN]                                                                           |
| Deleted in malignant brain tumors 1 protein OS=Homo sapiens OX=9606 GN=DMBT1 PE=1 SV=2 - [DMBT1_HUMAN]                                                                 |
| Putative lipocalin 1-like protein 1 OS=Homo sapiens OX=9606 GN=LCN1P1 PE=5 SV=1 - [LC1L1_HUMAN]                                                                        |
| 40S ribosomal protein S5 OS=Homo sapiens OX=9606 GN=RPS5 PE=1 SV=1 - [M0QZN2_HUMAN]                                                                                    |
| Keratin, type I cuticular Ha3-II OS=Homo sapiens OX=9606 GN=KRT33B PE=1 SV=3 - [KT33B_HUMAN]                                                                           |
| Histone H3.1 OS=Homo sapiens OX=9606 GN=HIST1H3A PE=1 SV=2 - [H31_HUMAN]                                                                                               |
| Alpha-2-macroglobulin OS=Homo sapiens OX=9606 GN=A2M PE=1 SV=3 - [A2MG_HUMAN]                                                                                          |
| Adenosylhomocysteinase OS=Homo sapiens OX=9606 GN=AHCY PE=2 SV=1 - [Q1RMG2_HUMAN]                                                                                      |
| L-plastin variant (Fragment) OS=Homo sapiens OX=9606 PE=2 SV=1 - [Q59GX5_HUMAN]                                                                                        |
| VH6DJ protein (Fragment) OS=Homo sapiens OX=9606 GN=VH6DJ PE=2 SV=1 - [A2N0U5_HUMAN]                                                                                   |
| Cytovillin 2 (Fragment) OS=Homo sapiens OX=9606 GN=VIL2 PE=2 SV=1 - [Q9UJU1_HUMAN]                                                                                     |

|                                                                                                                                                                                  |
|----------------------------------------------------------------------------------------------------------------------------------------------------------------------------------|
| cDNA FLJ54533, highly similar to Heterogeneous nuclear ribonucleoprotein H OS=Homo sapiens OX=9606 PE=2 SV=1 - [B4DP51_HUMAN]                                                    |
| Peptidyl-prolyl cis-trans isomerase OS=Homo sapiens OX=9606 GN=HEL-S-39 PE=2 SV=1 - [V9HWC6_HUMAN]                                                                               |
| 60S ribosomal protein L7 OS=Homo sapiens OX=9606 GN=RPL7 PE=1 SV=1 - [A8MUD9_HUMAN]                                                                                              |
| Transcobalamin-1 OS=Homo sapiens OX=9606 GN=TCN1 PE=1 SV=2 - [TCO1_HUMAN]                                                                                                        |
| 26S proteasome regulatory subunit 6A (Fragment) OS=Homo sapiens OX=9606 GN=PSMC3 PE=1 SV=9 - [E9PN50_HUMAN]                                                                      |
| Plakophilin 1 (Ectodermal dysplasia/skin fragility syndrome), isoform CRA_a OS=Homo sapiens OX=9606 GN=PKP1 PE=4 SV=1 - [A0A024R9]                                               |
| cDNA FLJ32530 fis, clone SMINT2000185, highly similar to TRANSKETOLASE (EC 2.2.1.1) OS=Homo sapiens OX=9606 PE=2 SV=1 - [B3KPZ8_HUMAN]                                           |
| Enolase 1 (Fragment) OS=Homo sapiens OX=9606 PE=2 SV=1 - [A4UCS8_HUMAN]                                                                                                          |
| cDNA FLJ59103, highly similar to T-complex protein 1 subunit epsilon OS=Homo sapiens OX=9606 PE=2 SV=1 - [B4DZY9_HUMAN]                                                          |
| cDNA FLJ35376 fis, clone SKMUS2004044, highly similar to Homo sapiens ribosomal protein L3 (RPL3), transcript variant 2, mRNA OS=Homo sapiens OX=9606 PE=2 SV=1 - [Q6MZX7_HUMAN] |
| Uncharacterized protein DKFZp686M24218 OS=Homo sapiens OX=9606 GN=DKFZp686M24218 PE=2 SV=1 - [Q6MZX7_HUMAN]                                                                      |
| Adenylyl cyclase-associated protein 1 (Fragment) OS=Homo sapiens OX=9606 GN=CAP1 PE=1 SV=1 - [Q5T0R7_HUMAN]                                                                      |
| Heat shock protein HSP 90-alpha (Fragment) OS=Homo sapiens OX=9606 GN=HSP90AA1 PE=1 SV=1 - [G3V2J8_HUMAN]                                                                        |
| Chaperone Hsp60, peptide-dependent ATPase, heat shock protein OS=Homo sapiens OX=9606 GN=groEL PE=4 SV=1 - [A0A2P9AGW9_HUMAN]                                                    |
| Coronin-1A OS=Homo sapiens OX=9606 GN=CORO1A PE=1 SV=4 - [COR1A_HUMAN]                                                                                                           |
| B-cell receptor-associated protein 31 (Fragment) OS=Homo sapiens OX=9606 GN=BCAP31 PE=1 SV=1 - [C9JMD7_HUMAN]                                                                    |
| Glucose-6-phosphate isomerase (Fragment) OS=Homo sapiens OX=9606 GN=GPI PE=1 SV=1 - [A0A0J9YXP8_HUMAN]                                                                           |
| Heterogeneous nuclear ribonucleoproteins C1/C2 (Fragment) OS=Homo sapiens OX=9606 GN=HNRNPC PE=1 SV=1 - [G3V5V7_HUMAN]                                                           |
| Extracellular matrix protein 1 OS=Homo sapiens OX=9606 GN=ECM1 PE=1 SV=2 - [ECM1_HUMAN]                                                                                          |
| Calmodulin-like skin protein variant (Fragment) OS=Homo sapiens OX=9606 PE=2 SV=1 - [Q53H37_HUMAN]                                                                               |
| Prohibitin (Fragment) OS=Homo sapiens OX=9606 GN=PHB PE=1 SV=1 - [C9JZ20_HUMAN]                                                                                                  |
| cDNA FLJ52524, moderately similar to Matrix metalloproteinase-9 (EC3.4.24.35) OS=Homo sapiens OX=9606 PE=2 SV=1 - [B7Z7V0_HUMAN]                                                 |
| Dynactin subunit 3 (Fragment) OS=Homo sapiens OX=9606 GN=DCTN3 PE=1 SV=1 - [X6RCK5_HUMAN]                                                                                        |
| Ribosomal protein L19 (Fragment) OS=Homo sapiens OX=9606 PE=2 SV=1 - [Q8IWR8_HUMAN]                                                                                              |
| Ganglioside GM2 activator OS=Homo sapiens OX=9606 GN=GM2A PE=1 SV=4 - [SAP3_HUMAN]                                                                                               |
| Keratin 23 (Histone deacetylase inducible) OS=Homo sapiens OX=9606 GN=KRT23 PE=2 SV=1 - [Q8TC04_HUMAN]                                                                           |
| Phosphoglycerate kinase OS=Homo sapiens OX=9606 PE=2 SV=1 - [B4DHM5_HUMAN]                                                                                                       |
| Ribosome-binding protein 1 OS=Homo sapiens OX=9606 GN=RRBP1 PE=1 SV=1 - [A0A087WVV2_HUMAN]                                                                                       |
| SERPINB12 protein OS=Homo sapiens OX=9606 GN=SERPINB12 PE=2 SV=1 - [Q3SYB5_HUMAN]                                                                                                |
| Alpha-1-antichymotrypsin OS=Homo sapiens OX=9606 GN=SERPINA3 PE=1 SV=1 - [G3V3A0_HUMAN]                                                                                          |
| ALDH2 (Fragment) OS=Homo sapiens OX=9606 GN=ALDH2 PE=3 SV=1 - [B4YAH7_HUMAN]                                                                                                     |
| cDNA FLJ51046, highly similar to 60 kDa heat shock protein, mitochondrial OS=Homo sapiens OX=9606 PE=2 SV=1 - [B7Z5E7_HUMAN]                                                     |
| Vitamin D-binding protein (Fragment) OS=Homo sapiens OX=9606 GN=GC PE=1 SV=1 - [D6RF20_HUMAN]                                                                                    |
| Malate dehydrogenase OS=Homo sapiens OX=9606 PE=2 SV=1 - [B3KTM1_HUMAN]                                                                                                          |
| KRT83 protein OS=Homo sapiens OX=9606 GN=KRT83 PE=2 SV=1 - [A0JNT2_HUMAN]                                                                                                        |
| Neuroblast differentiation-associated protein AHNAK OS=Homo sapiens OX=9606 GN=AHNAK PE=1 SV=2 - [AHNK_HUMAN]                                                                    |
| Catalase OS=Homo sapiens OX=9606 GN=CAT PE=1 SV=3 - [CATA_HUMAN]                                                                                                                 |
| Neutrophil gelatinase-associated lipocalin OS=Homo sapiens OX=9606 GN=LCN2 PE=1 SV=2 - [NGAL_HUMAN]                                                                              |
| cDNA FLJ60780, highly similar to Carboxypeptidase A4 (EC 3.4.17.-) OS=Homo sapiens OX=9606 PE=2 SV=1 - [B7Z577_HUMAN]                                                            |
| cDNA FLJ56576, highly similar to Collagen alpha-2(I) chain OS=Homo sapiens OX=9606 PE=2 SV=1 - [B4DN66_HUMAN]                                                                    |
| 40S ribosomal protein S7 OS=Homo sapiens OX=9606 GN=RPS7 PE=1 SV=1 - [B5MCP9_HUMAN]                                                                                              |
| Keratin, type I cytoskeletal 20 OS=Homo sapiens OX=9606 GN=KRT20 PE=1 SV=1 - [K1C20_HUMAN]                                                                                       |
| cDNA FLJ53009, highly similar to Calreticulin OS=Homo sapiens OX=9606 PE=2 SV=1 - [B4DHR1_HUMAN]                                                                                 |
| cDNA FLJ52062, highly similar to Erythrocyte band 7 integral membrane protein OS=Homo sapiens OX=9606 PE=2 SV=1 - [B4E2V5_HUMAN]                                                 |
| Proteinase 3 OS=Homo sapiens OX=9606 GN=PRTN3 PE=2 SV=1 - [D6CHE9_HUMAN]                                                                                                         |
| HNRNPA2B1 protein OS=Homo sapiens OX=9606 GN=HNRNPA2B1 PE=2 SV=1 - [I6L957_HUMAN]                                                                                                |
| F-box only protein 50 OS=Homo sapiens OX=9606 GN=NCCRP1 PE=1 SV=1 - [FBX50_HUMAN]                                                                                                |
| Elongation factor Tu, mitochondrial OS=Homo sapiens OX=9606 GN=TUFM PE=1 SV=2 - [EFTU_HUMAN]                                                                                     |
| NADH-ubiquinone oxidoreductase chain 5 OS=Homo sapiens OX=9606 GN=ND5 PE=3 SV=1 - [A0A096WP35_HUMAN]                                                                             |
| Proteasome subunit beta type-4 OS=Homo sapiens OX=9606 GN=PSMB4 PE=1 SV=4 - [PSB4_HUMAN]                                                                                         |
| Retroviral-like aspartic protease 1 OS=Homo sapiens OX=9606 GN=ASPRV1 PE=1 SV=1 - [APRV1_HUMAN]                                                                                  |
| Desmocollin 1, isoform CRA_b OS=Homo sapiens OX=9606 GN=DSC1 PE=4 SV=1 - [Q9HB00_HUMAN]                                                                                          |
| Eukaryotic translation initiation factor 4E OS=Homo sapiens OX=9606 GN=EIF4E PE=1 SV=2 - [IF4E_HUMAN]                                                                            |
| FN1 protein OS=Homo sapiens OX=9606 GN=FN1 PE=2 SV=1 - [B7ZLE5_HUMAN]                                                                                                            |
| Elongation factor 2 OS=Homo sapiens OX=9606 GN=EEF2 PE=1 SV=4 - [EF2_HUMAN]                                                                                                      |
| ATP-dependent RNA helicase DDX3X OS=Homo sapiens OX=9606 GN=DDX3X PE=1 SV=1 - [A0A0D9SFB3_HUMAN]                                                                                 |

|                                                                                                                                                                                |
|--------------------------------------------------------------------------------------------------------------------------------------------------------------------------------|
| Acylamino-acid-releasing enzyme (Fragment) OS=Homo sapiens OX=9606 GN=APEH PE=1 SV=1 - [H7C1U0_HUMAN]                                                                          |
| Protein POF1B OS=Homo sapiens OX=9606 GN=POF1B PE=1 SV=3 - [POF1B_HUMAN]                                                                                                       |
| Collagen alpha-1(I) chain OS=Homo sapiens OX=9606 GN=COL1A1 PE=1 SV=5 - [CO1A1_HUMAN]                                                                                          |
| S protein OS=Homo sapiens OX=9606 GN=S PE=4 SV=1 - [Q0EFA5_HUMAN]                                                                                                              |
| PURA protein (Fragment) OS=Homo sapiens OX=9606 GN=PURA PE=2 SV=1 - [Q2NLD4_HUMAN]                                                                                             |
| Creatine kinase U-type, mitochondrial (Fragment) OS=Homo sapiens OX=9606 GN=CKMT1B PE=1 SV=1 - [C9J6W7_HUMAN]                                                                  |
| Tigger transposable element-derived protein 6 OS=Homo sapiens OX=9606 GN=TIGD6 PE=2 SV=2 - [TIGD6_HUMAN]                                                                       |
| Glucose-6-phosphate 1-dehydrogenase (Fragment) OS=Homo sapiens OX=9606 GN=G6PD PE=3 SV=1 - [Q0PHS1_HUMAN]                                                                      |
| ELAV-like protein 1 OS=Homo sapiens OX=9606 GN=ELAVL1 PE=1 SV=2 - [ELAV1_HUMAN]                                                                                                |
| PAI-1 mRNA-binding protein variant OS=Homo sapiens OX=9606 PE=2 SV=1 - [Q5VU21_HUMAN]                                                                                          |
| Truncated profilaggrin OS=Homo sapiens OX=9606 GN=FLG PE=4 SV=1 - [I0B0K8_HUMAN]                                                                                               |
| Fibrinogen beta chain OS=Homo sapiens OX=9606 GN=FGB PE=1 SV=1 - [D6REL8_HUMAN]                                                                                                |
| cDNA FLJ51265, moderately similar to Beta-2-glycoprotein 1 (Beta-2-glycoprotein I) OS=Homo sapiens OX=9606 PE=2 SV=1 - [B4DPN0_HUMAN]                                          |
| Ribosomal protein L5, isoform CRA_b OS=Homo sapiens OX=9606 GN=RPL5 PE=2 SV=1 - [B3KTM6_HUMAN]                                                                                 |
| Skin-specific protein 32 OS=Homo sapiens OX=9606 GN=XP32 PE=1 SV=1 - [XP32_HUMAN]                                                                                              |
| cDNA FLJ35087 fis, clone PLACE6005546, highly similar to Polymerase I and transcript release factor OS=Homo sapiens OX=9606 PE=2 SV=1 - [PLACE6005546_HUMAN]                   |
| Sulfotransferase family cytosolic 2B member 1 OS=Homo sapiens OX=9606 GN=SULT2B1 PE=1 SV=2 - [ST2B1_HUMAN]                                                                     |
| Ubiquitin thioesterase OTU1 OS=Homo sapiens OX=9606 GN=YOD1 PE=1 SV=1 - [OTU1_HUMAN]                                                                                           |
| cDNA FLJ41699 fis, clone HCHON2004776, highly similar to Homo sapiens cytoskeleton-associated protein 4 (CKAP4), mRNA OS=Homo sapiens OX=9606 PE=2 SV=1 - [HCHON2004776_HUMAN] |
| Thymidine phosphorylase (Fragment) OS=Homo sapiens OX=9606 GN=TYMP PE=1 SV=1 - [C9JGI3_HUMAN]                                                                                  |
| cDNA FLJ51017, highly similar to ATP-dependent RNA helicase DDX1 (EC 3.6.1.-) (Fragment) OS=Homo sapiens OX=9606 PE=2 SV=1 - [B4DFI1_HUMAN]                                    |
| Sulfotransferase OS=Homo sapiens OX=9606 GN=BQ8482_180419 PE=4 SV=1 - [A0A2P9AJ95_HUMAN]                                                                                       |
| cDNA FLJ51358, highly similar to Involucrin OS=Homo sapiens OX=9606 PE=2 SV=1 - [B4DWR5_HUMAN]                                                                                 |
| cDNA FLJ35968 fis, clone TESTI2013053, highly similar to INSULIN-DEGRADING ENZYME (EC 3.4.24.56) OS=Homo sapiens OX=9606 PE=2 SV=1 - [TESTI2013053_HUMAN]                      |
| E3 ubiquitin-protein ligase TRIM21 OS=Homo sapiens OX=9606 GN=TRIM21 PE=1 SV=1 - [RO52_HUMAN]                                                                                  |
| Constitutive coactivator of PPAR-gamma-like protein 1 (Fragment) OS=Homo sapiens OX=9606 GN=FAM120A PE=1 SV=1 - [A0A0C4DH52_HUMAN]                                             |
| Kinesin-like protein KIF15 (Fragment) OS=Homo sapiens OX=9606 GN=KIF15 PE=1 SV=1 - [D6RCT7_HUMAN]                                                                              |
| Serpin A12 OS=Homo sapiens OX=9606 GN=SERPINA12 PE=1 SV=1 - [SPA12_HUMAN]                                                                                                      |
| Granulins (Fragment) OS=Homo sapiens OX=9606 GN=GRN PE=1 SV=1 - [K7EKL3_HUMAN]                                                                                                 |
| Chaperone Hsp60, peptide-dependent ATPase, heat shock protein OS=Homo sapiens OX=9606 GN=groEL PE=4 SV=1 - [A0A2P9ALX2_HUMAN]                                                  |
| Synaptosomal-associated protein 47 OS=Homo sapiens OX=9606 GN=SNAP47 PE=1 SV=1 - [A0A087X0B7_HUMAN]                                                                            |
| Insulin-like growth factor 2 mRNA-binding protein 3 OS=Homo sapiens OX=9606 GN=IGF2BP3 PE=1 SV=2 - [IF2B3_HUMAN]                                                               |
| Plectin OS=Homo sapiens OX=9606 GN=PLEC PE=1 SV=3 - [PLEC_HUMAN]                                                                                                               |
| cDNA FLJ32635 fis, clone SYNOV2000178, highly similar to Proteoglycan-4 OS=Homo sapiens OX=9606 PE=2 SV=1 - [B3KQ20_HUMAN]                                                     |
| Kinesin-like protein KIF11 OS=Homo sapiens OX=9606 GN=KIF11 PE=1 SV=2 - [KIF11_HUMAN]                                                                                          |
| cDNA FLJ57339, highly similar to Complement C3 OS=Homo sapiens OX=9606 PE=2 SV=1 - [B4E216_HUMAN]                                                                              |
| cDNA FLJ59294, highly similar to HECT, UBA and WWE domain-containing protein 1 (EC 6.3.2.-) (Fragment) OS=Homo sapiens OX=9606 PE=2 SV=1 - [B4E216_HUMAN]                      |
| cDNA FLJ51803, highly similar to Ryanodine receptor 1 OS=Homo sapiens OX=9606 PE=2 SV=1 - [B4DET7_HUMAN]                                                                       |
| Desmocollin 3, isoform CRA_b OS=Homo sapiens OX=9606 GN=DSC3 PE=4 SV=1 - [A0A024RC29_HUMAN]                                                                                    |
| Putative uncharacterized protein MYH16 OS=Homo sapiens OX=9606 GN=MYH16 PE=1 SV=2 - [MYH16_HUMAN]                                                                              |
| Periplakin (Fragment) OS=Homo sapiens OX=9606 GN=PPL PE=1 SV=1 - [K7EQ71_HUMAN]                                                                                                |
| Mucin-5B OS=Homo sapiens OX=9606 GN=MUC5B PE=1 SV=3 - [MUC5B_HUMAN]                                                                                                            |
| Collagen alpha-1(III) chain OS=Homo sapiens OX=9606 GN=COL3A1 PE=1 SV=4 - [CO3A1_HUMAN]                                                                                        |
| Fatty acid synthase OS=Homo sapiens OX=9606 GN=FASN PE=1 SV=1 - [A0A0U1RQF0_HUMAN]                                                                                             |
| Filamin-A OS=Homo sapiens OX=9606 GN=FLNA PE=1 SV=1 - [A0A087WWY3_HUMAN]                                                                                                       |
| Cardiomyopathy-associated protein 5 OS=Homo sapiens OX=9606 GN=CMYA5 PE=1 SV=3 - [CMYA5_HUMAN]                                                                                 |



| $\Sigma$ Coverage | $\Sigma$ # Proteins | $\Sigma$ # Unique Peptides | $\Sigma$ # Peptides | $\Sigma$ # PSMs | Score R20180600747_A SMSCs | Coverage R20180600747_ ASMSCs | # Peptides R20180600747_ ASMSCs |
|-------------------|---------------------|----------------------------|---------------------|-----------------|----------------------------|-------------------------------|---------------------------------|
| 71.36             | 4                   | 38                         | 49                  | 211             | 1331.49                    | 54.62                         | 32                              |
| 67.09             | 2                   | 45                         | 46                  | 231             | 1360.13                    | 52.49                         | 28                              |
| 67.02             | 12                  | 18                         | 31                  | 98              | 666.26                     | 43.97                         | 21                              |
| 63.16             | 2                   | 6                          | 6                   | 16              | 112.21                     | 33.33                         | 3                               |
| 61.49             | 19                  | 47                         | 54                  | 304             | 1768.91                    | 44.10                         | 37                              |
| 58.90             | 10                  | 11                         | 26                  | 108             | 833.69                     | 41.31                         | 20                              |
| 58.73             | 6                   | 29                         | 40                  | 202             | 1499.37                    | 52.23                         | 28                              |
| 48.97             | 14                  | 7                          | 39                  | 135             | 563.47                     | 33.83                         | 21                              |
| 46.23             | 3                   | 1                          | 4                   | 12              | 155.86                     | 46.23                         | 4                               |
| 44.21             | 13                  | 10                         | 19                  | 50              | 242.71                     | 21.53                         | 10                              |
| 42.92             | 34                  | 18                         | 19                  | 55              | 262.71                     | 18.24                         | 9                               |
| 42.73             | 8                   | 1                          | 33                  | 129             | 538.51                     | 28.90                         | 20                              |
| 42.73             | 1                   | 5                          | 5                   | 12              | 94.93                      | 30.00                         | 3                               |
| 42.71             | 13                  | 22                         | 37                  | 145             | 713.66                     | 35.42                         | 22                              |
| 41.04             | 8                   | 1                          | 4                   | 8               | 29.61                      | 8.21                          | 1                               |
| 40.59             | 2                   | 3                          | 3                   | 8               | 57.96                      | 10.89                         | 1                               |
| 40.00             | 19                  | 5                          | 5                   | 12              | 0.00                       | 8.97                          | 1                               |
| 38.90             | 72                  | 4                          | 10                  | 42              | 252.52                     | 30.84                         | 8                               |
| 38.83             | 3                   | 4                          | 4                   | 11              | 121.76                     | 38.83                         | 4                               |
| 38.71             | 1                   | 4                          | 4                   | 8               | 62.69                      | 31.18                         | 3                               |
| 38.57             | 4                   | 3                          | 3                   | 4               | 72.01                      | 38.57                         | 3                               |
| 38.32             | 1                   | 44                         | 44                  | 134             | 413.63                     | 17.16                         | 13                              |
| 37.67             | 1                   | 4                          | 4                   | 9               | 94.88                      | 24.66                         | 3                               |
| 36.75             | 14                  | 30                         | 30                  | 133             | 674.83                     | 32.31                         | 24                              |
| 36.50             | 3                   | 1                          | 27                  | 89              | 436.15                     | 23.38                         | 15                              |
| 34.83             | 5                   | 5                          | 5                   | 6               | 90.22                      | 34.83                         | 5                               |
| 33.61             | 39                  | 2                          | 2                   | 6               | 28.25                      | 26.23                         | 1                               |
| 33.04             | 7                   | 15                         | 15                  | 64              | 254.06                     | 28.70                         | 9                               |
| 32.56             | 2                   | 2                          | 11                  | 22              | 105.21                     | 20.00                         | 7                               |
| 31.51             | 29                  | 4                          | 6                   | 13              | 247.38                     | 23.74                         | 3                               |
| 31.36             | 139                 | 1                          | 3                   | 4               | 49.72                      | 25.42                         | 2                               |
| 31.19             | 10                  | 1                          | 2                   | 4               | 151.76                     | 31.19                         | 2                               |
| 31.01             | 14                  | 4                          | 4                   | 11              | 85.55                      | 13.92                         | 2                               |
| 30.61             | 2                   | 2                          | 2                   | 4               | 53.88                      | 30.61                         | 2                               |
| 30.26             | 2                   | 0                          | 10                  | 19              | 105.21                     | 17.44                         | 6                               |
| 30.00             | 3                   | 2                          | 2                   | 2               | 29.04                      | 16.25                         | 1                               |
| 29.63             | 33                  | 3                          | 6                   | 19              | 181.87                     | 22.69                         | 4                               |
| 29.51             | 4                   | 4                          | 5                   | 8               | 59.59                      | 11.48                         | 2                               |
| 29.34             | 49                  | 4                          | 4                   | 6               | 42.32                      | 5.79                          | 1                               |
| 29.20             | 27                  | 9                          | 9                   | 18              | 65.39                      | 10.32                         | 3                               |
| 28.81             | 136                 | 1                          | 3                   | 4               | 47.65                      | 22.88                         | 2                               |
| 28.57             | 15                  | 1                          | 3                   | 12              | 117.35                     | 19.05                         | 2                               |
| 28.24             | 134                 | 1                          | 3                   | 5               | 0.00                       | 14.50                         | 1                               |
| 27.41             | 58                  | 3                          | 8                   | 36              | 163.93                     | 24.20                         | 7                               |
| 27.14             | 3                   | 3                          | 3                   | 5               | 66.05                      | 27.14                         | 3                               |
| 26.05             | 84                  | 2                          | 3                   | 4               | 40.97                      | 9.24                          | 1                               |
| 25.85             | 4                   | 4                          | 4                   | 7               | 24.77                      | 7.80                          | 1                               |
| 25.72             | 5                   | 7                          | 7                   | 11              | 330.66                     | 19.65                         | 5                               |
| 25.24             | 5                   | 1                          | 2                   | 5               | 51.27                      | 17.48                         | 1                               |
| 25.23             | 5                   | 2                          | 2                   | 3               | 56.76                      | 16.82                         | 1                               |
| 25.17             | 4                   | 7                          | 7                   | 13              | 149.07                     | 18.79                         | 4                               |
| 25.00             | 10                  | 3                          | 6                   | 12              | 29.61                      | 3.40                          | 1                               |

|       |     |    |    |    |        |       |   |
|-------|-----|----|----|----|--------|-------|---|
| 25.00 | 1   | 1  | 2  | 2  | 0.00   | 15.38 | 1 |
| 24.30 | 1   | 1  | 2  | 3  | 67.33  | 24.30 | 2 |
| 24.21 | 1   | 2  | 2  | 3  | 59.36  | 13.68 | 1 |
| 23.91 | 3   | 1  | 1  | 2  | 41.85  | 23.91 | 1 |
| 23.91 | 1   | 7  | 7  | 10 | 44.33  | 3.42  | 1 |
| 23.84 | 19  | 7  | 11 | 31 | 181.01 | 9.28  | 4 |
| 23.32 | 35  | 2  | 6  | 9  | 0.00   | 2.88  | 1 |
| 23.31 | 8   | 2  | 8  | 15 | 74.81  | 12.47 | 4 |
| 23.25 | 11  | 3  | 11 | 34 | 270.10 | 19.00 | 9 |
| 22.95 | 8   | 2  | 2  | 2  | 41.43  | 13.93 | 1 |
| 22.60 | 19  | 35 | 35 | 46 | 82.99  | 3.42  | 5 |
| 22.46 | 149 | 1  | 4  | 7  | 145.96 | 14.83 | 2 |
| 22.45 | 75  | 1  | 1  | 1  | 43.96  | 22.45 | 1 |
| 22.22 | 4   | 3  | 4  | 7  | 46.67  | 6.43  | 1 |
| 21.95 | 1   | 1  | 1  | 8  | 44.55  | 21.95 | 1 |
| 21.57 | 17  | 3  | 3  | 5  | 43.19  | 8.50  | 1 |
| 21.48 | 1   | 4  | 4  | 5  | 205.14 | 21.48 | 4 |
| 21.05 | 23  | 2  | 2  | 2  | 47.65  | 21.05 | 2 |
| 21.00 | 1   | 7  | 7  | 12 | 165.09 | 15.49 | 5 |
| 20.96 | 9   | 7  | 7  | 13 | 140.43 | 12.76 | 4 |
| 20.95 | 3   | 3  | 3  | 4  | 59.71  | 14.86 | 2 |
| 20.82 | 20  | 9  | 9  | 17 | 168.10 | 12.37 | 5 |
| 20.59 | 1   | 2  | 2  | 2  | 82.55  | 20.59 | 2 |
| 20.19 | 3   | 2  | 2  | 2  | 76.41  | 20.19 | 2 |
| 20.00 | 6   | 1  | 1  | 2  | 58.87  | 20.00 | 1 |
| 20.00 | 16  | 1  | 2  | 3  | 0.00   | 10.83 | 1 |
| 19.73 | 12  | 12 | 12 | 25 | 129.04 | 7.25  | 4 |
| 19.65 | 4   | 6  | 10 | 26 | 253.14 | 10.70 | 6 |
| 19.49 | 85  | 1  | 2  | 3  | 32.63  | 13.56 | 1 |
| 19.42 | 3   | 2  | 2  | 3  | 37.25  | 19.42 | 2 |
| 19.40 | 7   | 5  | 5  | 9  | 82.48  | 8.96  | 3 |
| 19.39 | 12  | 2  | 2  | 4  | 40.52  | 12.24 | 1 |
| 19.23 | 1   | 1  | 2  | 2  | 0.00   | 9.62  | 1 |
| 19.15 | 21  | 1  | 1  | 1  | 53.93  | 19.15 | 1 |
| 18.95 | 31  | 3  | 5  | 8  | 76.12  | 11.69 | 3 |
| 18.18 | 2   | 4  | 4  | 6  | 33.56  | 8.68  | 2 |
| 18.03 | 10  | 4  | 4  | 5  | 27.76  | 7.14  | 1 |
| 17.86 | 10  | 1  | 1  | 1  | 46.65  | 17.86 | 1 |
| 17.84 | 37  | 6  | 6  | 20 | 86.42  | 14.07 | 4 |
| 17.62 | 46  | 2  | 4  | 5  | 32.10  | 4.41  | 1 |
| 17.47 | 20  | 6  | 7  | 27 | 266.93 | 14.95 | 6 |
| 17.19 | 17  | 1  | 5  | 7  | 0.00   | 2.68  | 1 |
| 16.87 | 8   | 5  | 5  | 7  | 187.08 | 16.87 | 5 |
| 16.82 | 4   | 1  | 1  | 1  | 52.85  | 16.82 | 1 |
| 16.81 | 13  | 6  | 7  | 22 | 144.09 | 7.30  | 3 |
| 16.67 | 2   | 1  | 1  | 1  | 37.12  | 16.67 | 1 |
| 16.24 | 16  | 10 | 10 | 13 | 305.02 | 13.51 | 8 |
| 15.99 | 93  | 5  | 7  | 21 | 237.26 | 10.73 | 4 |
| 15.89 | 3   | 2  | 2  | 3  | 48.03  | 15.89 | 2 |
| 15.87 | 21  | 2  | 2  | 4  | 23.27  | 8.73  | 1 |
| 15.52 | 20  | 6  | 7  | 8  | 29.91  | 2.46  | 1 |
| 15.51 | 42  | 2  | 4  | 5  | 24.29  | 3.67  | 1 |
| 15.48 | 6   | 1  | 1  | 3  | 24.07  | 15.48 | 1 |
| 15.31 | 7   | 1  | 1  | 2  | 32.68  | 15.31 | 1 |
| 15.22 | 7   | 1  | 1  | 1  | 39.74  | 15.22 | 1 |
| 15.19 | 4   | 1  | 1  | 1  | 35.24  | 15.19 | 1 |

|       |    |    |    |    |        |       |    |
|-------|----|----|----|----|--------|-------|----|
| 15.09 | 87 | 3  | 5  | 7  | 41.43  | 5.17  | 2  |
| 14.90 | 11 | 9  | 9  | 21 | 66.38  | 4.87  | 3  |
| 14.77 | 6  | 1  | 1  | 1  | 32.35  | 14.77 | 1  |
| 14.67 | 14 | 1  | 2  | 7  | 45.45  | 9.78  | 1  |
| 14.53 | 38 | 1  | 3  | 4  | 32.10  | 5.59  | 1  |
| 14.52 | 8  | 1  | 1  | 1  | 20.11  | 14.52 | 1  |
| 14.45 | 7  | 42 | 42 | 73 | 269.31 | 5.75  | 14 |
| 14.29 | 12 | 3  | 3  | 4  | 43.58  | 4.23  | 1  |
| 14.17 | 9  | 3  | 8  | 22 | 64.26  | 2.33  | 2  |
| 14.02 | 3  | 2  | 10 | 41 | 204.16 | 8.60  | 5  |
| 14.00 | 3  | 8  | 8  | 10 | 44.33  | 1.30  | 1  |
| 14.00 | 5  | 1  | 1  | 1  | 35.22  | 14.00 | 1  |
| 14.00 | 7  | 2  | 2  | 3  | 53.19  | 14.00 | 2  |
| 13.97 | 2  | 2  | 2  | 3  | 76.00  | 13.97 | 2  |
| 13.85 | 12 | 1  | 1  | 2  | 38.17  | 13.85 | 1  |
| 13.84 | 8  | 3  | 3  | 3  | 59.61  | 13.84 | 3  |
| 13.49 | 5  | 5  | 9  | 35 | 242.92 | 8.65  | 5  |
| 13.49 | 6  | 2  | 2  | 2  | 64.71  | 13.49 | 2  |
| 13.33 | 2  | 2  | 2  | 5  | 50.71  | 6.67  | 1  |
| 13.08 | 47 | 2  | 2  | 9  | 51.57  | 12.15 | 1  |
| 13.04 | 2  | 1  | 1  | 1  | 44.10  | 13.04 | 1  |
| 12.99 | 4  | 2  | 2  | 3  | 62.24  | 12.99 | 2  |
| 12.92 | 4  | 2  | 2  | 2  | 42.16  | 12.92 | 2  |
| 12.55 | 1  | 3  | 3  | 4  | 87.66  | 12.55 | 3  |
| 12.54 | 5  | 7  | 8  | 11 | 60.69  | 1.68  | 1  |
| 12.50 | 2  | 2  | 2  | 4  | 22.50  | 7.24  | 1  |
| 12.50 | 6  | 1  | 1  | 1  | 36.76  | 12.50 | 1  |
| 12.41 | 6  | 1  | 1  | 1  | 0.00   | 12.41 | 1  |
| 12.38 | 1  | 1  | 1  | 3  | 67.75  | 12.38 | 1  |
| 12.36 | 5  | 1  | 1  | 1  | 31.59  | 12.36 | 1  |
| 12.36 | 7  | 9  | 9  | 12 | 140.24 | 9.18  | 6  |
| 12.35 | 3  | 1  | 1  | 1  | 39.35  | 12.35 | 1  |
| 12.25 | 1  | 1  | 1  | 1  |        |       |    |
| 12.21 | 3  | 8  | 8  | 12 | 173.13 | 9.53  | 6  |
| 12.12 | 6  | 1  | 1  | 1  | 64.76  | 12.12 | 1  |
| 12.09 | 6  | 1  | 1  | 1  | 30.30  | 12.09 | 1  |
| 11.98 | 7  | 2  | 2  | 3  | 46.68  | 11.98 | 2  |
| 11.94 | 4  | 1  | 1  | 1  | 72.11  | 11.94 | 1  |
| 11.76 | 28 | 3  | 5  | 12 | 95.14  | 7.71  | 3  |
| 11.70 | 9  | 2  | 2  | 2  | 0.00   | 6.43  | 1  |
| 11.60 | 5  | 3  | 3  | 3  | 33.21  | 3.04  | 1  |
| 11.54 | 3  | 5  | 6  | 11 | 85.06  | 6.54  | 3  |
| 11.39 | 7  | 1  | 1  | 3  | 31.40  | 11.39 | 1  |
| 11.34 | 10 | 1  | 1  | 3  | 37.27  | 11.34 | 1  |
| 11.21 | 6  | 1  | 1  | 1  | 0.00   | 11.21 | 1  |
| 11.20 | 12 | 1  | 1  | 1  | 39.18  | 11.20 | 1  |
| 10.96 | 6  | 8  | 8  | 13 | 154.89 | 6.55  | 5  |
| 10.84 | 10 | 1  | 1  | 1  | 49.17  | 10.84 | 1  |
| 10.80 | 10 | 4  | 4  | 5  | 44.26  | 4.43  | 2  |
| 10.77 | 83 | 2  | 4  | 9  | 121.38 | 7.03  | 2  |
| 10.76 | 2  | 2  | 2  | 2  | 34.36  | 5.06  | 1  |
| 10.68 | 5  | 1  | 1  | 1  | 32.69  | 10.68 | 1  |
| 10.66 | 32 | 2  | 4  | 8  | 121.98 | 6.64  | 3  |
| 10.63 | 17 | 2  | 2  | 4  | 49.47  | 5.80  | 1  |
| 10.58 | 1  | 1  | 1  | 1  | 54.55  | 10.58 | 1  |
| 10.53 | 2  | 1  | 1  | 2  | 26.97  | 10.53 | 1  |

|       |    |   |   |    |        |       |   |
|-------|----|---|---|----|--------|-------|---|
| 10.53 | 4  | 1 | 1 | 1  | 40.17  | 10.53 | 1 |
| 10.20 | 1  | 7 | 7 | 19 | 95.14  | 4.67  | 3 |
| 10.07 | 10 | 3 | 3 | 4  | 57.75  | 2.68  | 1 |
| 10.00 | 1  | 1 | 1 | 3  | 51.24  | 10.00 | 1 |
| 10.00 | 9  | 1 | 1 | 1  | 0.00   | 10.00 | 1 |
| 9.92  | 7  | 2 | 2 | 3  | 38.92  | 3.57  | 1 |
| 9.90  | 9  | 3 | 3 | 3  | 85.86  | 9.90  | 3 |
| 9.86  | 10 | 2 | 2 | 4  | 58.09  | 9.86  | 2 |
| 9.69  | 1  | 6 | 6 | 7  | 232.87 | 9.69  | 6 |
| 9.65  | 9  | 1 | 1 | 1  | 51.16  | 9.65  | 1 |
| 9.57  | 4  | 1 | 1 | 4  | 45.30  | 9.57  | 1 |
| 9.57  | 2  | 1 | 1 | 1  | 0.00   | 9.57  | 1 |
| 9.41  | 2  | 1 | 1 | 2  | 48.81  | 9.41  | 1 |
| 9.38  | 10 | 1 | 1 | 3  | 42.84  | 9.38  | 1 |
| 9.38  | 6  | 1 | 1 | 1  | 0.00   | 9.38  | 1 |
| 9.15  | 4  | 1 | 1 | 1  | 0.00   | 9.15  | 1 |
| 9.09  | 3  | 1 | 1 | 1  | 36.54  | 9.09  | 1 |
| 9.09  | 5  | 2 | 2 | 2  | 16.82  | 9.09  | 2 |
| 9.07  | 27 | 4 | 4 | 4  | 38.51  | 2.63  | 1 |
| 9.02  | 4  | 2 | 2 | 3  | 42.46  | 9.02  | 2 |
| 8.87  | 23 | 3 | 3 | 3  | 44.70  | 2.22  | 1 |
| 8.85  | 2  | 2 | 2 | 2  | 44.82  | 8.85  | 2 |
| 8.78  | 8  | 1 | 1 | 1  | 0.00   | 8.78  | 1 |
| 8.61  | 6  | 1 | 1 | 1  | 42.26  | 8.61  | 1 |
| 8.57  | 2  | 1 | 1 | 3  | 51.38  | 8.57  | 1 |
| 8.53  | 4  | 3 | 3 | 6  | 49.93  | 4.27  | 2 |
| 8.42  | 2  | 1 | 1 | 1  | 54.85  | 8.42  | 1 |
| 8.41  | 6  | 1 | 6 | 20 | 132.25 | 4.09  | 3 |
| 8.38  | 6  | 3 | 3 | 3  | 68.39  | 8.38  | 3 |
| 8.23  | 4  | 2 | 2 | 2  | 43.25  | 2.88  | 1 |
| 8.21  | 2  | 1 | 1 | 1  | 0.00   | 8.21  | 1 |
| 8.14  | 1  | 3 | 4 | 4  | 38.51  | 3.43  | 2 |
| 8.00  | 14 | 1 | 2 | 3  | 66.72  | 4.00  | 1 |
| 7.95  | 1  | 7 | 7 | 18 | 99.13  | 2.97  | 2 |
| 7.85  | 2  | 3 | 3 | 3  | 116.07 | 7.85  | 3 |
| 7.55  | 13 | 4 | 4 | 4  | 53.61  | 7.55  | 4 |
| 7.55  | 11 | 1 | 1 | 1  | 33.20  | 7.55  | 1 |
| 7.52  | 4  | 1 | 1 | 1  | 36.47  | 7.52  | 1 |
| 7.50  | 7  | 1 | 1 | 1  | 49.19  | 7.50  | 1 |
| 7.50  | 11 | 1 | 1 | 1  | 41.34  | 7.50  | 1 |
| 7.43  | 4  | 1 | 1 | 1  | 28.80  | 7.43  | 1 |
| 7.32  | 2  | 1 | 1 | 5  | 45.65  | 7.32  | 1 |
| 7.31  | 8  | 3 | 3 | 3  | 70.91  | 7.31  | 3 |
| 7.20  | 1  | 1 | 1 | 1  | 58.39  | 7.20  | 1 |
| 7.12  | 10 | 1 | 2 | 2  | 29.95  | 4.07  | 1 |
| 7.09  | 1  | 1 | 1 | 1  | 0.00   | 7.09  | 1 |
| 6.96  | 1  | 1 | 1 | 2  | 79.89  | 6.96  | 1 |
| 6.79  | 2  | 1 | 1 | 2  | 69.34  | 6.79  | 1 |
| 6.72  | 5  | 1 | 1 | 3  | 50.31  | 6.72  | 1 |
| 6.68  | 11 | 2 | 3 | 3  | 76.17  | 4.95  | 2 |
| 6.62  | 4  | 1 | 1 | 1  | 29.39  | 6.62  | 1 |
| 6.58  | 1  | 8 | 8 | 14 | 35.80  | 0.68  | 1 |
| 6.54  | 2  | 2 | 2 | 2  | 39.51  | 2.61  | 1 |
| 6.43  | 10 | 3 | 3 | 3  | 117.51 | 6.43  | 3 |
| 6.42  | 25 | 2 | 2 | 2  | 40.53  | 6.42  | 1 |
| 6.38  | 19 | 1 | 1 | 3  | 47.02  | 6.38  | 1 |



|      |    |   |   |    |        |      |   |
|------|----|---|---|----|--------|------|---|
| 6.29 | 13 | 1 | 1 | 3  | 36.35  | 6.29 | 1 |
| 6.25 | 2  | 1 | 1 | 1  | 37.87  | 6.25 | 1 |
| 6.25 | 4  | 1 | 1 | 1  | 38.77  | 6.25 | 1 |
| 6.24 | 1  | 3 | 3 | 3  | 103.54 | 6.24 | 3 |
| 6.23 | 7  | 1 | 1 | 1  | 0.00   | 6.23 | 1 |
| 6.20 | 4  | 4 | 4 | 6  | 115.83 | 6.20 | 4 |
| 6.15 | 8  | 1 | 1 | 1  | 38.04  | 6.15 | 1 |
| 6.02 | 4  | 1 | 1 | 1  | 40.90  | 6.02 | 1 |
| 6.01 | 13 | 1 | 1 | 1  | 24.84  | 6.01 | 1 |
| 5.93 | 13 | 2 | 2 | 2  | 23.21  | 2.54 | 1 |
| 5.88 | 1  | 2 | 3 | 3  | 45.30  | 5.04 | 2 |
| 5.75 | 13 | 1 | 1 | 1  | 28.68  | 5.75 | 1 |
| 5.75 | 11 | 1 | 1 | 1  | 53.67  | 5.75 | 1 |
| 5.71 | 3  | 3 | 3 | 3  | 55.25  | 3.50 | 2 |
| 5.64 | 10 | 3 | 3 | 3  | 65.64  | 5.64 | 3 |
| 5.62 | 6  | 1 | 1 | 1  | 59.99  | 5.62 | 1 |
| 5.60 | 9  | 1 | 1 | 1  | 68.76  | 5.60 | 1 |
| 5.56 | 18 | 1 | 1 | 1  | 27.71  | 5.56 | 1 |
| 5.56 | 3  | 3 | 3 | 3  | 61.58  | 5.56 | 3 |
| 5.48 | 2  | 1 | 1 | 1  | 48.77  | 5.48 | 1 |
| 5.47 | 8  | 1 | 1 | 1  | 36.39  | 5.47 | 1 |
| 5.43 | 5  | 1 | 1 | 1  | 29.07  | 5.43 | 1 |
| 5.30 | 2  | 1 | 1 | 1  | 42.32  | 5.30 | 1 |
| 5.20 | 5  | 1 | 1 | 3  | 61.99  | 5.20 | 1 |
| 5.18 | 1  | 1 | 1 | 1  | 63.17  | 5.18 | 1 |
| 4.98 | 4  | 1 | 2 | 3  | 75.66  | 4.98 | 2 |
| 4.96 | 4  | 1 | 1 | 1  | 38.67  | 4.96 | 1 |
| 4.93 | 9  | 4 | 4 | 5  | 54.03  | 2.25 | 2 |
| 4.92 | 2  | 1 | 1 | 1  | 34.57  | 4.92 | 1 |
| 4.88 | 3  | 1 | 1 | 1  | 44.06  | 4.88 | 1 |
| 4.86 | 3  | 1 | 1 | 1  | 0.00   | 4.86 | 1 |
| 4.84 | 5  | 1 | 1 | 2  | 132.20 | 4.84 | 1 |
| 4.83 | 6  | 1 | 1 | 1  | 51.99  | 4.83 | 1 |
| 4.76 | 6  | 1 | 1 | 1  | 63.81  | 4.76 | 1 |
| 4.70 | 15 | 1 | 2 | 2  | 33.01  | 2.01 | 1 |
| 4.70 | 5  | 5 | 5 | 11 | 68.40  | 1.99 | 2 |
| 4.55 | 1  | 2 | 2 | 2  | 41.06  | 2.85 | 1 |
| 4.55 | 3  | 1 | 1 | 1  | 28.71  | 4.55 | 1 |
| 4.42 | 3  | 1 | 1 | 1  | 55.09  | 4.42 | 1 |
| 4.41 | 4  | 1 | 1 | 1  | 0.00   | 4.41 | 1 |
| 4.28 | 2  | 1 | 1 | 1  | 41.84  | 4.28 | 1 |
| 4.25 | 2  | 1 | 2 | 8  | 61.10  | 4.25 | 2 |
| 4.25 | 3  | 1 | 1 | 1  | 0.00   | 4.25 | 1 |
| 4.22 | 3  | 1 | 1 | 1  | 49.03  | 4.22 | 1 |
| 4.19 | 3  | 1 | 1 | 2  | 55.28  | 4.19 | 1 |
| 4.02 | 4  | 1 | 1 | 3  | 43.51  | 4.02 | 1 |
| 4.00 | 1  | 1 | 1 | 1  | 47.18  | 4.00 | 1 |
| 3.98 | 1  | 1 | 1 | 1  | 45.57  | 3.98 | 1 |
| 3.81 | 1  | 1 | 1 | 1  | 0.00   | 3.81 | 1 |
| 3.79 | 1  | 1 | 1 | 1  | 43.61  | 3.79 | 1 |
| 3.79 | 1  | 1 | 1 | 1  | 90.88  | 3.79 | 1 |
| 3.69 | 2  | 3 | 3 | 4  | 21.08  | 1.67 | 1 |
| 3.69 | 4  | 1 | 1 | 1  | 39.12  | 3.69 | 1 |
| 3.62 | 23 | 7 | 7 | 10 | 110.00 | 2.99 | 6 |
| 3.61 | 7  | 3 | 3 | 3  | 34.06  | 1.05 | 1 |
| 3.59 | 12 | 2 | 2 | 2  | 42.01  | 3.59 | 2 |

|      |    |   |   |    |        |      |   |
|------|----|---|---|----|--------|------|---|
| 3.57 | 3  | 1 | 1 | 1  | 25.74  | 3.57 | 1 |
| 3.57 | 1  | 2 | 2 | 2  | 55.62  | 3.57 | 2 |
| 3.55 | 5  | 5 | 5 | 7  | 60.53  | 1.50 | 2 |
| 3.52 | 13 | 1 | 1 | 1  | 35.75  | 3.52 | 1 |
| 3.51 | 4  | 1 | 1 | 1  | 20.42  | 3.51 | 1 |
| 3.45 | 9  | 1 | 1 | 1  | 40.34  | 3.45 | 1 |
| 3.45 | 1  | 1 | 1 | 1  | 0.00   | 3.45 | 1 |
| 3.37 | 8  | 1 | 1 | 1  | 32.59  | 3.37 | 1 |
| 3.37 | 1  | 1 | 1 | 1  | 37.43  | 3.37 | 1 |
| 3.36 | 5  | 1 | 1 | 2  | 64.09  | 3.36 | 1 |
| 3.33 | 11 | 7 | 7 | 11 | 50.17  | 1.77 | 3 |
| 3.31 | 4  | 1 | 1 | 2  | 62.35  | 3.31 | 1 |
| 3.28 | 3  | 1 | 1 | 1  | 44.71  | 3.28 | 1 |
| 3.24 | 3  | 1 | 1 | 1  | 39.00  | 3.24 | 1 |
| 3.20 | 1  | 1 | 1 | 1  | 35.27  | 3.20 | 1 |
| 3.19 | 2  | 1 | 1 | 1  | 22.91  | 3.19 | 1 |
| 3.01 | 1  | 1 | 1 | 1  | 71.98  | 3.01 | 1 |
| 2.59 | 1  | 1 | 1 | 1  | 24.90  | 2.59 | 1 |
| 2.50 | 4  | 1 | 1 | 1  | 31.80  | 2.50 | 1 |
| 2.47 | 3  | 1 | 1 | 1  | 33.86  | 2.47 | 1 |
| 2.46 | 4  | 1 | 1 | 1  | 31.02  | 2.46 | 1 |
| 2.28 | 1  | 1 | 1 | 3  | 42.54  | 2.28 | 1 |
| 2.23 | 3  | 1 | 1 | 1  | 27.55  | 2.23 | 1 |
| 2.16 | 4  | 1 | 1 | 1  | 50.20  | 2.16 | 1 |
| 2.11 | 1  | 1 | 1 | 1  |        |      |   |
| 2.02 | 2  | 1 | 1 | 1  | 24.04  | 2.02 | 1 |
| 1.97 | 2  | 1 | 1 | 1  | 25.47  | 1.97 | 1 |
| 1.93 | 1  | 1 | 1 | 1  | 37.11  | 1.93 | 1 |
| 1.80 | 5  | 1 | 1 | 1  | 41.64  | 1.80 | 1 |
| 1.67 | 1  | 1 | 1 | 3  | 59.62  | 1.67 | 1 |
| 1.67 | 3  | 1 | 1 | 1  |        |      |   |
| 1.55 | 1  | 1 | 1 | 1  | 0.00   | 1.55 | 1 |
| 1.47 | 4  | 6 | 6 | 6  | 28.55  | 0.17 | 1 |
| 1.42 | 4  | 1 | 1 | 1  | 50.11  | 1.42 | 1 |
| 1.33 | 1  | 1 | 1 | 1  | 66.49  | 1.33 | 1 |
| 1.28 | 2  | 1 | 1 | 1  | 26.44  | 1.28 | 1 |
| 1.12 | 6  | 1 | 1 | 1  | 23.42  | 1.12 | 1 |
| 1.04 | 4  | 1 | 1 | 1  | 48.56  | 1.04 | 1 |
| 1.00 | 3  | 1 | 1 | 1  | 42.53  | 1.00 | 1 |
| 1.00 | 1  | 1 | 1 | 1  | 35.36  | 1.00 | 1 |
| 0.99 | 3  | 1 | 1 | 2  | 47.43  | 0.99 | 1 |
| 0.89 | 2  | 4 | 4 | 4  | 152.60 | 0.89 | 4 |
| 0.75 | 1  | 1 | 1 | 3  | 42.61  | 0.75 | 1 |
| 0.44 | 2  | 1 | 1 | 1  | 43.80  | 0.44 | 1 |
| 0.35 | 6  | 1 | 1 | 1  | 28.33  | 0.35 | 1 |
| 0.17 | 1  | 1 | 1 | 1  | 0.00   | 0.17 | 1 |

| # PSM<br>R20180600747_A<br>SMSCs | Score<br>R20180600747_I<br>GG | Coverage<br>R20180600747_I<br>GG | # Peptides<br>R20180600747_I<br>GG | # PSM<br>R20180600747_I<br>GG | # AAs | MW [kDa] | calc. pI |
|----------------------------------|-------------------------------|----------------------------------|------------------------------------|-------------------------------|-------|----------|----------|
| 46                               | 864.66                        | 37.87                            | 22                                 | 27                            | 639   | 65.4     | 8.00     |
| 43                               | 1096.41                       | 52.33                            | 27                                 | 34                            | 623   | 62.0     | 5.24     |
| 29                               | 271.81                        | 29.60                            | 11                                 | 14                            | 473   | 51.2     | 5.05     |
| 4                                |                               |                                  |                                    |                               | 114   | 13.2     | 6.13     |
| 58                               | 1489.81                       | 44.57                            | 40                                 | 54                            | 644   | 66.0     | 8.12     |
| 30                               | 456.28                        | 30.72                            | 13                                 | 17                            | 472   | 51.5     | 5.16     |
| 45                               | 769.09                        | 39.73                            | 19                                 | 24                            | 584   | 58.8     | 5.21     |
| 28                               | 554.66                        | 31.21                            | 19                                 | 22                            | 535   | 57.8     | 8.00     |
| 5                                | 56.34                         | 18.87                            | 1                                  | 2                             | 106   | 11.2     | 8.29     |
| 11                               | 105.44                        | 11.57                            | 4                                  | 4                             | 432   | 48.1     | 5.02     |
| 10                               | 301.26                        | 19.31                            | 9                                  | 9                             | 466   | 53.6     | 5.12     |
| 27                               | 502.10                        | 26.06                            | 17                                 | 20                            | 564   | 60.0     | 8.00     |
| 3                                | 65.24                         | 22.73                            | 2                                  | 2                             | 110   | 11.3     | 6.54     |
| 28                               | 575.39                        | 26.44                            | 19                                 | 22                            | 590   | 62.3     | 7.74     |
| 1                                |                               |                                  |                                    |                               | 134   | 14.8     | 9.54     |
| 1                                |                               |                                  |                                    |                               | 101   | 11.5     | 6.77     |
| 1                                | 67.46                         | 15.17                            | 2                                  | 2                             | 145   | 16.3     | 4.65     |
| 10                               | 214.15                        | 23.92                            | 6                                  | 8                             | 347   | 38.6     | 5.35     |
| 5                                |                               |                                  |                                    |                               | 103   | 11.4     | 11.36    |
| 3                                | 41.59                         | 7.53                             | 1                                  | 1                             | 93    | 10.8     | 7.03     |
| 3                                |                               |                                  |                                    |                               | 70    | 8.2      | 8.56     |
| 14                               | 288.23                        | 19.89                            | 15                                 | 17                            | 2850  | 282.2    | 10.04    |
| 3                                | 60.36                         | 8.22                             | 1                                  | 1                             | 146   | 16.6     | 8.05     |
| 27                               | 536.33                        | 20.51                            | 15                                 | 22                            | 585   | 66.5     | 6.04     |
| 19                               | 365.26                        | 21.48                            | 11                                 | 13                            | 526   | 55.7     | 8.43     |
| 6                                |                               |                                  |                                    |                               | 178   | 19.6     | 5.95     |
| 1                                | 55.60                         | 26.23                            | 1                                  | 1                             | 122   | 13.7     | 6.14     |
| 12                               |                               |                                  |                                    |                               | 345   | 39.0     | 8.48     |
| 8                                |                               |                                  |                                    |                               | 390   | 44.5     | 6.81     |
| 4                                | 124.93                        | 14.16                            | 2                                  | 2                             | 219   | 24.0     | 8.06     |
| 2                                |                               |                                  |                                    |                               | 118   | 12.9     | 6.58     |
| 2                                | 47.40                         | 14.68                            | 1                                  | 1                             | 109   | 11.6     | 8.29     |
| 2                                |                               |                                  |                                    |                               | 158   | 17.4     | 9.50     |
| 2                                | 50.18                         | 18.37                            | 1                                  | 1                             | 98    | 11.0     | 5.50     |
| 7                                |                               |                                  |                                    |                               | 390   | 44.7     | 6.64     |
| 1                                |                               |                                  |                                    |                               | 80    | 9.3      | 9.72     |
| 4                                | 66.20                         | 17.13                            | 2                                  | 3                             | 216   | 22.9     | 8.31     |
| 2                                | 38.87                         | 6.01                             | 1                                  | 1                             | 183   | 20.1     | 8.78     |
| 1                                |                               |                                  |                                    |                               | 242   | 27.3     | 4.50     |
| 3                                |                               |                                  |                                    |                               | 339   | 38.6     | 7.75     |
| 2                                |                               |                                  |                                    |                               | 118   | 13.3     | 7.12     |
| 2                                | 56.34                         | 19.05                            | 1                                  | 2                             | 105   | 11.3     | 7.87     |
| 1                                |                               |                                  |                                    |                               | 131   | 14.4     | 7.96     |
| 8                                | 96.70                         | 13.99                            | 4                                  | 5                             | 343   | 38.6     | 5.38     |
| 3                                |                               |                                  |                                    |                               | 140   | 15.0     | 8.27     |
| 1                                |                               |                                  |                                    |                               | 119   | 13.0     | 8.62     |
| 1                                |                               |                                  |                                    |                               | 205   | 22.8     | 6.40     |
| 5                                |                               |                                  |                                    |                               | 346   | 38.7     | 7.02     |
| 2                                | 45.97                         | 17.48                            | 1                                  | 1                             | 103   | 11.5     | 7.58     |
| 1                                |                               |                                  |                                    |                               | 107   | 11.6     | 8.51     |
| 4                                | 49.03                         | 3.36                             | 1                                  | 1                             | 298   | 34.2     | 6.05     |
| 1                                |                               |                                  |                                    |                               | 324   | 35.9     | 9.88     |

|    |        |       |   |   |      |       |       |
|----|--------|-------|---|---|------|-------|-------|
| 1  | 57.45  | 9.62  | 1 | 1 | 104  | 11.2  | 6.15  |
| 2  |        |       |   |   | 107  | 10.0  | 8.44  |
| 1  |        |       |   |   | 95   | 10.4  | 4.88  |
| 1  |        |       |   |   | 46   | 5.4   | 9.61  |
| 1  | 33.18  | 3.42  | 1 | 1 | 322  | 34.7  | 7.21  |
| 5  | 138.27 | 9.28  | 4 | 5 | 474  | 51.7  | 6.81  |
| 1  |        |       |   |   | 416  | 46.2  | 5.12  |
| 5  |        |       |   |   | 369  | 42.3  | 6.05  |
| 12 | 70.50  | 5.00  | 2 | 2 | 400  | 44.1  | 5.14  |
| 1  |        |       |   |   | 122  | 13.9  | 8.72  |
| 5  | 54.73  | 1.33  | 2 | 2 | 1960 | 226.4 | 5.60  |
| 2  | 47.40  | 6.78  | 1 | 1 | 236  | 25.1  | 8.12  |
| 1  |        |       |   |   | 49   | 5.9   | 4.82  |
| 1  | 38.87  | 6.43  | 1 | 1 | 171  | 19.0  | 6.92  |
| 2  | 33.80  | 21.95 | 1 | 2 | 41   | 5.0   | 8.05  |
| 1  |        |       |   |   | 153  | 16.7  | 9.33  |
| 5  |        |       |   |   | 256  | 26.7  | 5.76  |
| 2  |        |       |   |   | 76   | 8.4   | 7.14  |
| 5  |        |       |   |   | 381  | 41.9  | 5.01  |
| 4  |        |       |   |   | 439  | 48.5  | 5.92  |
| 2  |        |       |   |   | 148  | 16.7  | 10.51 |
| 5  |        |       |   |   | 485  | 53.0  | 6.84  |
| 2  |        |       |   |   | 136  | 15.1  | 7.62  |
| 2  |        |       |   |   | 104  | 11.5  | 9.07  |
| 1  |        |       |   |   | 50   | 5.6   | 9.63  |
| 1  | 112.59 | 20.00 | 2 | 2 | 120  | 13.1  | 7.12  |
| 4  | 77.94  | 5.91  | 3 | 4 | 745  | 81.7  | 6.14  |
| 9  | 86.32  | 2.62  | 2 | 2 | 458  | 49.6  | 4.96  |
| 1  |        |       |   |   | 118  | 13.1  | 6.07  |
| 2  |        |       |   |   | 103  | 11.6  | 4.92  |
| 3  | 50.25  | 2.39  | 1 | 1 | 335  | 36.0  | 8.46  |
| 1  |        |       |   |   | 98   | 10.5  | 9.17  |
| 1  | 57.45  | 9.62  | 1 | 1 | 104  | 11.3  | 8.37  |
| 1  |        |       |   |   | 47   | 5.0   | 11.90 |
| 3  |        |       |   |   | 248  | 27.8  | 4.74  |
| 2  |        |       |   |   | 242  | 27.7  | 5.58  |
| 1  |        |       |   |   | 294  | 32.6  | 4.78  |
| 1  |        |       |   |   | 56   | 6.5   | 10.35 |
| 4  | 83.66  | 5.78  | 2 | 2 | 398  | 43.0  | 8.81  |
| 1  |        |       |   |   | 227  | 26.4  | 4.78  |
| 8  | 75.41  | 13.05 | 5 | 5 | 475  | 52.3  | 8.57  |
| 1  |        |       |   |   | 448  | 49.9  | 5.06  |
| 5  |        |       |   |   | 332  | 36.7  | 8.27  |
| 1  |        |       |   |   | 107  | 12.1  | 9.85  |
| 4  | 93.08  | 2.43  | 1 | 2 | 452  | 50.5  | 5.67  |
| 1  |        |       |   |   | 108  | 11.8  | 8.68  |
| 8  |        |       |   |   | 696  | 76.6  | 8.02  |
| 5  | 133.40 | 8.50  | 3 | 4 | 494  | 53.1  | 6.86  |
| 2  |        |       |   |   | 151  | 16.3  | 10.05 |
| 1  | 31.94  | 8.73  | 1 | 1 | 126  | 14.0  | 10.32 |
| 1  |        |       |   |   | 406  | 45.2  | 6.58  |
| 1  |        |       |   |   | 245  | 27.7  | 4.79  |
| 1  | 55.55  | 15.48 | 1 | 1 | 84   | 9.2   | 10.27 |
| 1  |        |       |   |   | 98   | 10.6  | 5.45  |
| 1  |        |       |   |   | 92   | 9.9   | 5.58  |
| 1  |        |       |   |   | 79   | 9.0   | 11.53 |

|    |        |       |   |   |      |       |       |
|----|--------|-------|---|---|------|-------|-------|
| 2  | 27.80  | 3.66  | 1 | 2 | 464  | 51.1  | 7.71  |
| 3  | 62.13  | 1.47  | 2 | 2 | 678  | 74.8  | 7.12  |
| 1  |        |       |   |   | 88   | 9.8   | 4.59  |
| 1  | 95.22  | 14.67 | 2 | 2 | 184  | 20.4  | 5.52  |
| 1  |        |       |   |   | 179  | 20.6  | 4.61  |
| 1  |        |       |   |   | 62   | 6.8   | 9.70  |
| 14 | 174.65 | 2.61  | 7 | 7 | 2871 | 331.6 | 6.81  |
| 1  |        |       |   |   | 189  | 20.4  | 8.44  |
| 2  | 81.25  | 5.00  | 2 | 4 | 600  | 64.8  | 7.56  |
| 8  | 165.80 | 8.60  | 4 | 6 | 535  | 57.8  | 7.20  |
| 1  | 55.80  | 2.89  | 1 | 1 | 693  | 76.6  | 5.86  |
| 1  |        |       |   |   | 100  | 11.5  | 10.15 |
| 2  | 17.27  | 6.00  | 1 | 1 | 250  | 28.8  | 9.44  |
| 3  |        |       |   |   | 136  | 15.5  | 10.07 |
| 1  |        |       |   |   | 65   | 7.3   | 9.38  |
| 3  |        |       |   |   | 477  | 50.6  | 8.47  |
| 8  | 122.41 | 3.46  | 2 | 3 | 578  | 61.8  | 5.85  |
| 2  |        |       |   |   | 126  | 14.2  | 10.46 |
| 1  |        |       |   |   | 135  | 15.2  | 7.01  |
| 1  | 69.84  | 12.15 | 1 | 1 | 107  | 11.9  | 8.37  |
| 1  |        |       |   |   | 92   | 9.1   | 4.46  |
| 2  |        |       |   |   | 177  | 20.1  | 9.60  |
| 2  |        |       |   |   | 178  | 20.5  | 6.02  |
| 3  |        |       |   |   | 255  | 28.8  | 11.19 |
| 1  |        |       |   |   | 654  | 72.3  | 5.16  |
| 1  | 33.90  | 7.24  | 1 | 1 | 152  | 17.7  | 10.99 |
| 1  |        |       |   |   | 80   | 9.2   | 7.97  |
| 1  |        |       |   |   | 137  | 15.5  | 8.57  |
| 1  |        |       |   |   | 105  | 11.7  | 4.92  |
| 1  |        |       |   |   | 89   | 9.7   | 10.36 |
| 6  |        |       |   |   | 817  | 89.7  | 6.04  |
| 1  |        |       |   |   | 81   | 8.9   | 10.14 |
|    | 0.00   | 12.25 | 1 | 1 | 204  | 22.4  | 7.58  |
| 6  |        |       |   |   | 745  | 83.8  | 8.97  |
| 1  |        |       |   |   | 66   | 7.8   | 5.31  |
| 1  |        |       |   |   | 91   | 10.1  | 10.21 |
| 2  |        |       |   |   | 167  | 17.7  | 5.71  |
| 1  |        |       |   |   | 134  | 14.9  | 7.50  |
| 3  |        |       |   |   | 493  | 53.5  | 5.86  |
| 1  |        |       |   |   | 171  | 19.0  | 11.72 |
| 1  |        |       |   |   | 362  | 38.2  | 5.55  |
| 3  | 43.89  | 4.23  | 2 | 2 | 520  | 56.8  | 6.02  |
| 1  |        |       |   |   | 79   | 9.0   | 10.89 |
| 1  |        |       |   |   | 97   | 10.5  | 9.17  |
| 1  |        |       |   |   | 116  | 12.6  | 9.41  |
| 1  |        |       |   |   | 125  | 13.9  | 5.31  |
| 5  |        |       |   |   | 748  | 86.1  | 7.96  |
| 1  |        |       |   |   | 83   | 8.8   | 4.42  |
| 2  |        |       |   |   | 361  | 39.3  | 8.40  |
| 2  | 30.27  | 2.20  | 1 | 1 | 455  | 48.9  | 6.81  |
| 1  |        |       |   |   | 158  | 17.8  | 6.02  |
| 1  |        |       |   |   | 103  | 11.7  | 10.33 |
| 4  |        |       |   |   | 572  | 62.4  | 5.69  |
| 1  |        |       |   |   | 207  | 24.4  | 5.59  |
| 1  |        |       |   |   | 104  | 11.7  | 5.24  |
| 1  |        |       |   |   | 76   | 8.4   | 6.73  |

|   |       |      |   |   |      |       |       |
|---|-------|------|---|---|------|-------|-------|
| 1 |       |      |   |   | 114  | 12.7  | 7.96  |
| 3 | 73.70 | 2.19 | 2 | 2 | 1049 | 113.7 | 5.03  |
| 1 |       |      |   |   | 298  | 32.8  | 9.74  |
| 1 |       |      |   |   | 90   | 9.9   | 8.25  |
| 1 |       |      |   |   | 130  | 14.5  | 11.75 |
| 1 |       |      |   |   | 252  | 29.2  | 10.65 |
| 3 |       |      |   |   | 303  | 34.5  | 7.71  |
| 2 |       |      |   |   | 213  | 21.4  | 10.93 |
| 7 |       |      |   |   | 764  | 83.2  | 5.74  |
| 1 |       |      |   |   | 114  | 13.0  | 4.88  |
| 1 |       |      |   |   | 94   | 10.1  | 10.07 |
| 1 |       |      |   |   | 94   | 10.2  | 6.99  |
| 1 |       |      |   |   | 85   | 9.7   | 5.45  |
| 1 |       |      |   |   | 96   | 11.5  | 10.90 |
| 1 |       |      |   |   | 128  | 14.0  | 7.34  |
| 1 |       |      |   |   | 142  | 15.6  | 10.04 |
| 1 |       |      |   |   | 88   | 10.1  | 6.93  |
| 2 |       |      |   |   | 231  | 26.7  | 6.79  |
| 1 |       |      |   |   | 419  | 47.3  | 8.92  |
| 2 |       |      |   |   | 244  | 28.0  | 6.44  |
| 1 |       |      |   |   | 406  | 46.1  | 5.48  |
| 2 |       |      |   |   | 192  | 20.6  | 8.90  |
| 1 |       |      |   |   | 148  | 15.1  | 10.68 |
| 1 |       |      |   |   | 151  | 17.9  | 4.98  |
| 1 |       |      |   |   | 105  | 11.7  | 7.18  |
| 2 |       |      |   |   | 375  | 41.2  | 6.79  |
| 1 |       |      |   |   | 95   | 10.5  | 4.81  |
| 4 | 93.24 | 1.94 | 1 | 2 | 464  | 50.5  | 5.47  |
| 3 |       |      |   |   | 334  | 37.7  | 6.29  |
| 1 |       |      |   |   | 243  | 27.2  | 9.94  |
| 1 |       |      |   |   | 134  | 14.8  | 10.23 |
| 2 |       |      |   |   | 467  | 52.2  | 4.94  |
| 1 | 30.71 | 4.00 | 1 | 1 | 300  | 32.2  | 7.85  |
| 2 | 93.89 | 5.06 | 3 | 3 | 2391 | 247.9 | 8.31  |
| 3 |       |      |   |   | 484  | 52.5  | 7.55  |
| 4 |       |      |   |   | 689  | 75.7  | 5.81  |
| 1 |       |      |   |   | 106  | 11.6  | 9.00  |
| 1 |       |      |   |   | 133  | 14.2  | 9.86  |
| 1 |       |      |   |   | 120  | 13.0  | 6.77  |
| 1 |       |      |   |   | 80   | 9.2   | 9.94  |
| 1 |       |      |   |   | 148  | 16.2  | 11.90 |
| 1 | 32.02 | 7.32 | 1 | 1 | 123  | 14.0  | 4.78  |
| 3 |       |      |   |   | 465  | 53.2  | 6.40  |
| 1 |       |      |   |   | 125  | 13.7  | 10.11 |
| 1 |       |      |   |   | 295  | 32.4  | 5.48  |
| 1 |       |      |   |   | 381  | 41.9  | 5.66  |
| 1 |       |      |   |   | 2413 | 260.6 | 5.44  |
| 1 | 69.76 | 6.79 | 1 | 1 | 162  | 17.9  | 5.00  |
| 1 | 38.69 | 6.72 | 1 | 1 | 134  | 14.8  | 8.48  |
| 2 |       |      |   |   | 404  | 46.2  | 4.84  |
| 1 |       |      |   |   | 136  | 15.4  | 11.12 |
| 1 | 31.60 | 1.22 | 1 | 1 | 1474 | 163.2 | 6.46  |
| 1 |       |      |   |   | 306  | 33.8  | 6.61  |
| 3 |       |      |   |   | 498  | 55.7  | 5.34  |
| 1 |       |      |   |   | 109  | 12.2  | 5.36  |
| 1 |       |      |   |   | 141  | 16.2  | 9.31  |

|   |       |      |  |   |      |       |       |      |
|---|-------|------|--|---|------|-------|-------|------|
| 1 |       |      |  |   | 159  | 16.8  | 5.19  |      |
| 1 |       |      |  |   | 208  | 22.7  | 9.32  |      |
| 1 |       |      |  |   | 208  | 24.4  | 10.67 |      |
| 3 |       |      |  |   | 433  | 48.2  | 5.03  |      |
| 1 |       |      |  |   | 257  | 28.6  | 5.05  |      |
| 4 | 35.24 | 1.10 |  | 1 | 1    | 726   | 80.4  | 8.97 |
| 1 |       |      |  |   | 358  | 38.9  | 7.72  |      |
| 1 |       |      |  |   | 166  | 17.8  | 8.88  |      |
| 1 |       |      |  |   | 283  | 32.0  | 8.50  |      |
| 1 |       |      |  |   | 354  | 40.1  | 10.30 |      |
| 2 |       |      |  |   | 476  | 52.4  | 7.77  |      |
| 1 |       |      |  |   | 174  | 19.2  | 7.05  |      |
| 1 |       |      |  |   | 174  | 20.1  | 4.63  |      |
| 2 |       |      |  |   | 543  | 58.0  | 5.22  |      |
| 3 |       |      |  |   | 461  | 51.0  | 6.68  |      |
| 1 |       |      |  |   | 178  | 20.2  | 9.13  |      |
| 1 |       |      |  |   | 268  | 30.4  | 9.01  |      |
| 1 |       |      |  |   | 180  | 20.2  | 4.70  |      |
| 3 |       |      |  |   | 540  | 60.6  | 6.71  |      |
| 1 |       |      |  |   | 146  | 15.9  | 4.44  |      |
| 1 |       |      |  |   | 201  | 22.3  | 5.96  |      |
| 1 |       |      |  |   | 276  | 31.1  | 7.14  |      |
| 1 |       |      |  |   | 151  | 17.3  | 6.58  |      |
| 1 |       |      |  |   | 173  | 20.8  | 11.44 |      |
| 1 |       |      |  |   | 193  | 20.8  | 5.31  |      |
| 2 |       |      |  |   | 422  | 48.1  | 6.54  |      |
| 1 |       |      |  |   | 242  | 25.7  | 5.78  |      |
| 2 |       |      |  |   | 934  | 102.7 | 5.34  |      |
| 1 |       |      |  |   | 183  | 20.9  | 5.87  |      |
| 1 |       |      |  |   | 205  | 23.4  | 5.64  |      |
| 1 |       |      |  |   | 247  | 26.6  | 5.90  |      |
| 2 |       |      |  |   | 517  | 55.0  | 5.60  |      |
| 1 |       |      |  |   | 145  | 16.1  | 5.83  |      |
| 1 |       |      |  |   | 231  | 24.6  | 7.99  |      |
| 1 |       |      |  |   | 447  | 49.6  | 5.39  |      |
| 3 |       |      |  |   | 5890 | 628.7 | 6.15  |      |
| 1 |       |      |  |   | 527  | 59.7  | 7.39  |      |
| 1 |       |      |  |   | 198  | 22.6  | 8.91  |      |
| 1 |       |      |  |   | 226  | 25.2  | 6.39  |      |
| 1 |       |      |  |   | 204  | 19.8  | 10.10 |      |
| 1 |       |      |  |   | 187  | 21.3  | 10.27 |      |
| 2 |       |      |  |   | 424  | 48.5  | 5.69  |      |
| 1 |       |      |  |   | 212  | 24.3  | 5.11  |      |
| 1 |       |      |  |   | 237  | 25.9  | 7.39  |      |
| 1 |       |      |  |   | 215  | 23.6  | 8.16  |      |
| 1 |       |      |  |   | 249  | 28.4  | 4.86  |      |
| 1 |       |      |  |   | 275  | 30.8  | 6.62  |      |
| 1 |       |      |  |   | 452  | 49.5  | 7.61  |      |
| 1 |       |      |  |   | 603  | 67.0  | 9.03  |      |
| 1 |       |      |  |   | 264  | 29.2  | 5.97  |      |
| 1 |       |      |  |   | 343  | 37.0  | 5.44  |      |
| 1 |       |      |  |   | 840  | 93.8  | 5.53  |      |
| 1 |       |      |  |   | 217  | 25.1  | 6.15  |      |
| 6 | 30.95 | 1.29 |  | 2 | 2    | 2240  | 246.5 | 6.06 |
| 1 |       |      |  |   | 858  | 95.3  | 6.83  |      |
| 2 |       |      |  |   | 640  | 70.8  | 7.36  |      |

|   |       |      |   |   |      |       |      |
|---|-------|------|---|---|------|-------|------|
| 1 |       |      |   |   | 308  | 34.6  | 6.54 |
| 2 |       |      |   |   | 589  | 68.0  | 6.32 |
| 2 |       |      |   |   | 1464 | 138.9 | 5.80 |
| 1 |       |      |   |   | 512  | 49.9  | 8.13 |
| 1 |       |      |   |   | 285  | 32.0  | 7.05 |
| 1 |       |      |   |   | 203  | 22.5  | 9.22 |
| 1 |       |      |   |   | 521  | 58.6  | 6.80 |
| 1 |       |      |   |   | 297  | 33.9  | 5.90 |
| 1 |       |      |   |   | 326  | 36.1  | 9.17 |
| 1 |       |      |   |   | 387  | 42.4  | 8.44 |
| 3 | 34.25 | 0.20 | 1 | 1 | 4021 | 430.2 | 9.29 |
| 1 |       |      |   |   | 272  | 31.2  | 7.25 |
| 1 |       |      |   |   | 274  | 30.3  | 7.85 |
| 1 |       |      |   |   | 247  | 28.0  | 9.13 |
| 1 |       |      |   |   | 250  | 26.2  | 7.97 |
| 1 |       |      |   |   | 345  | 39.0  | 6.51 |
| 1 |       |      |   |   | 365  | 41.3  | 5.40 |
| 1 |       |      |   |   | 348  | 38.3  | 6.11 |
| 1 |       |      |   |   | 521  | 58.1  | 5.25 |
| 1 |       |      |   |   | 445  | 46.1  | 5.52 |
| 1 |       |      |   |   | 529  | 59.2  | 8.25 |
| 1 | 54.21 | 2.28 | 1 | 1 | 527  | 58.5  | 7.37 |
| 1 |       |      |   |   | 449  | 52.5  | 4.49 |
| 1 |       |      |   |   | 464  | 54.2  | 7.72 |
|   | 40.76 | 2.11 | 1 | 1 | 475  | 54.1  | 6.38 |
| 1 |       |      |   |   | 495  | 54.0  | 7.52 |
| 1 |       |      |   |   | 711  | 82.4  | 6.48 |
| 1 |       |      |   |   | 414  | 47.1  | 9.29 |
| 1 |       |      |   |   | 388  | 41.3  | 6.52 |
| 1 |       |      |   |   | 539  | 56.8  | 5.39 |
|   | 48.01 | 1.67 | 1 | 1 | 419  | 47.3  | 6.96 |
| 1 |       |      |   |   | 579  | 63.7  | 8.87 |
| 1 |       |      |   |   | 4684 | 531.5 | 5.96 |
| 1 |       |      |   |   | 494  | 55.5  | 9.92 |
| 1 |       |      |   |   | 1056 | 119.1 | 5.64 |
| 1 |       |      |   |   | 1098 | 122.5 | 6.93 |
| 1 |       |      |   |   | 1343 | 148.8 | 5.53 |
| 1 |       |      |   |   | 675  | 76.6  | 5.68 |
| 1 |       |      |   |   | 896  | 99.9  | 6.10 |
| 1 |       |      |   |   | 1097 | 128.2 | 5.49 |
| 2 |       |      |   |   | 1115 | 131.3 | 5.58 |
| 4 |       |      |   |   | 5762 | 596.0 | 6.64 |
| 1 |       |      |   |   | 1466 | 138.5 | 6.61 |
| 1 |       |      |   |   | 2509 | 273.0 | 6.47 |
| 1 |       |      |   |   | 2315 | 245.7 | 5.97 |
| 1 |       |      |   |   | 4069 | 448.9 | 4.78 |
